# Supplementary material for: Defects in placental syncytiotrophoblast cells are a common cause of developmental heart disease
Source: PubMed Central journal article supplement (PMC9978031; doi:10.1038/s41467-023-36740-5), 2023-03-01
Supplement: 41467_2023_36740_MOESM1_ESM.pdf [file 41467_2023_36740_MOESM1_ESM.pdf]

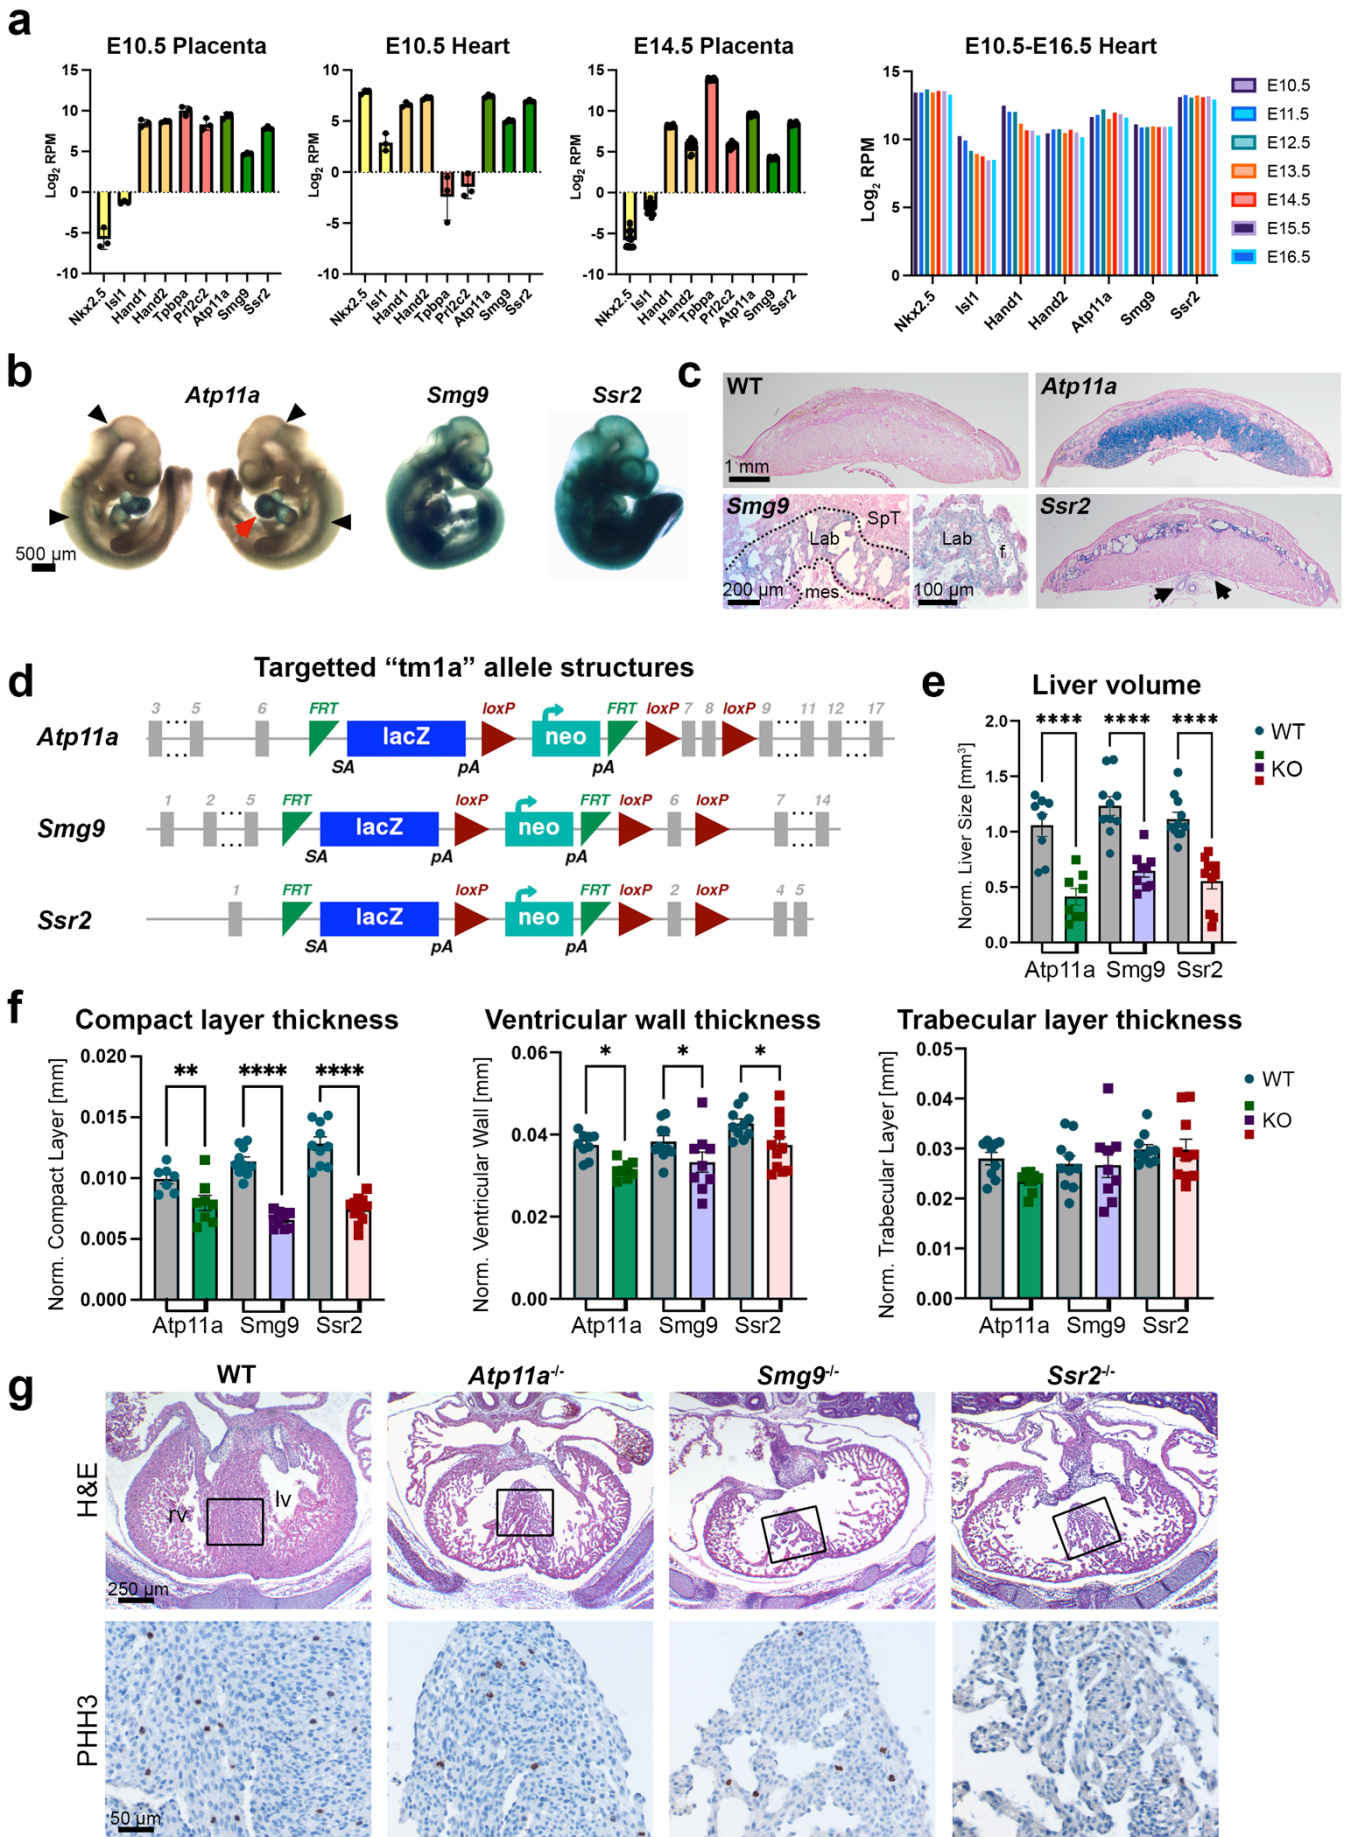

## Supplementary Figure 1. Expression and phenotypic analysis of selected mouse mutant genes.

**a** RNA-seq data of E10.5 hearts and placentas, E14.5 placentas and across an E10.5-E16.5 developmental time course of heart development<sup>1</sup> show that *Atp11a*, *Smg9* and *Ssr2* are expressed in both organs. Genes colour-coded in yellow, orange and red are heart and placenta markers that are displayed for comparative reference. Data are displayed as mean +/- SEM from: E10.5 n=3 and E14.5 n=23 samples. **b** Whole-mount LacZ staining of E10.5 embryos heterozygous for the tm1a alleles of *Atp11a*, *Smg9* and *Ssr2*, revealing their endogenous expression pattern. Black arrowheads point to distinct *Atp11a* expression at the midbrain-hindbrain boundary and in the notochord, the red arrowhead points to high expression in the heart ventricles. **c** LacZ staining of E14.5 (WT, *Atp11a*<sup>+/-</sup>, *Ssr2*<sup>+/-</sup>) and E10.5 (*Smg9*<sup>+/-</sup>) placental cryosections. *Smg9* expression decreases during gestation and was not detectable at E14.5 by LacZ staining of cryosections. Two different magnification views are shown for E10.5, the developing labyrinth (Lab) is outlined by dotted lines. Syncytiotrophoblast cells are positive for LacZ, whereas extraembryonic mesoderm (mes.) is negative. For *Ssr2*, black arrows point to expression in extra-embryonic mesoderm of the umbilical cord and fetal endothelial cells. SpT = spongiotrophoblast; f = fetal vessel. Images are representative of at least 3 placentas per genotype. **d** Allele structure and targeted exons, flanked by LoxP sites, of tm1a knockout-first alleles for *Atp11a*, *Smg9* and *Ssr2*. **e** Liver size measurements reveals a significant size reduction in KO embryos. Statistics: One-way ANOVA with Holm-Šidák's multiple comparisons test. \*\*\*  $p < 0.001$ , \*\*\*\*  $p < 0.0001$ . **f** Additional measurements of heart structures by segmentation of 3D  $\mu$ CT imaging data. Significance was evaluated using one-way ANOVA with Holm-Šidák's multiple comparisons test. \*  $p < 0.05$ , \*\*  $p < 0.01$ , \*\*\*\*  $p < 0.0001$ . Data in **e-f** are displayed as mean +/- SEM from *Atp11a*: WT n=7, KO n=8, *Smg9*: WT n=10, KO n=9; *Ssr2*: WT= 10, KO n=11 samples. **g** H&E stainings and immunohistochemical detection of phospho-histone H3 at serine 10 (PHH3) on paraffin sections through the heart of WT and KO E14.5 embryos, revealing severe VSDs and myocardial wall thinning in all mutants, possibly due to lower cardiomyocyte proliferation rates. The rectangle identifies the region shown in the PHH3 stainings. Lv=left ventricle, rv=right ventricle. Images are representative of 3 samples per genotype. Source data are provided as a Source Data file. All exact  $p$ -values are provided in Supplementary Data 1.

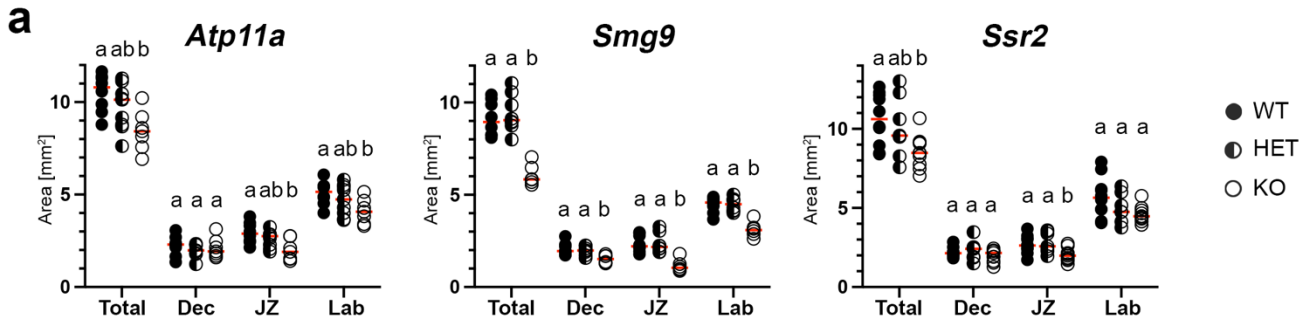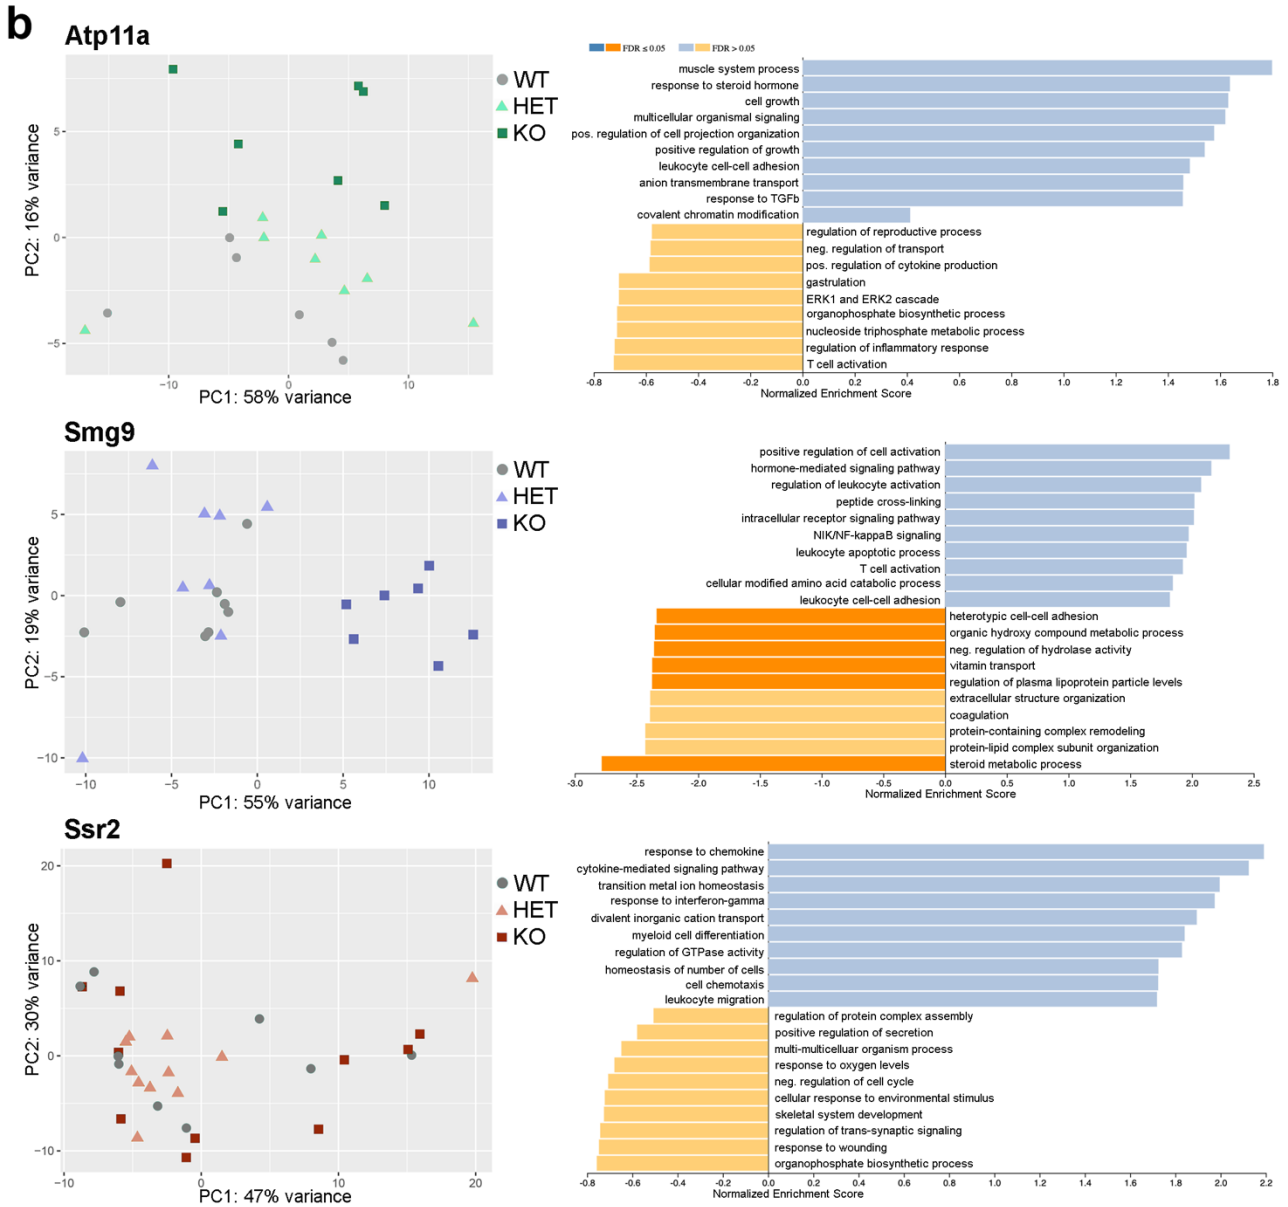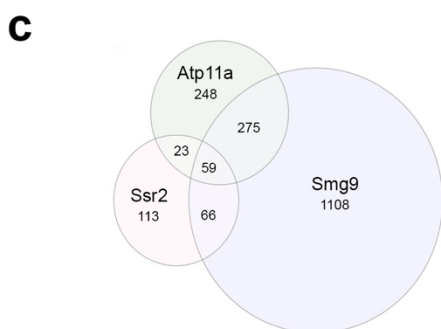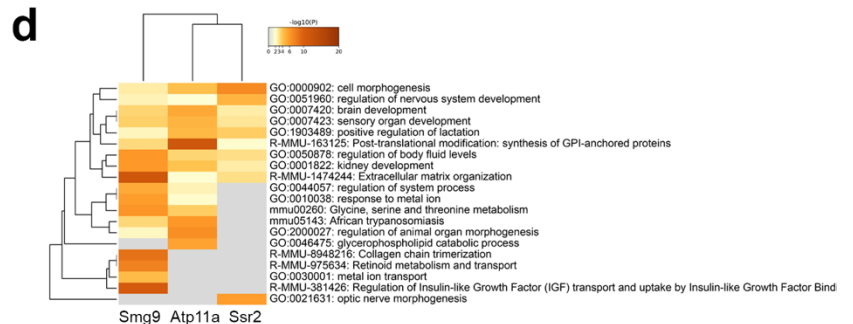

**Supplementary Figure 2. Placental phenotype and transcriptome-wide gene expression analysis.**

**a** Area measurements of wild-type (WT), heterozygous (HET) and knockout (KO) placentas for each of the three mouse mutant lines. Measurements were performed on three sections around the placental midline that were stained for *Tpbpa* expression by *in situ* hybridization. *Tpbpa* demarcates the junctional zone (JZ) and thereby allows for an unambiguous determination of the dimensions of the decidua (Dec) and labyrinth (Lab). Statistical significance was determined using two-way ANOVA with Tukey's multiple comparisons test on *Atp11a*: WT n=8, HET = 9, KO n=7, *Smg9*: WT n=8, HET n = 8, KO n=6; *Ssr2*: WT= 10, HET = 7, KO n=10 samples. Letters depict statistical similarities (same letter) and differences (discrepant letter). All exact *p*-values are provided in Supplementary Data 1.

**b** Principal component analysis (PCA) of placental transcriptomes for each genotype (WT, HET, KO) in the three mutant lines. RNA-seq data included that passed quality control analyses were of 6-11 placentas of each genotype for the three mutant lines (75 RNA-seq datasets in total). Differential gene expression was determined using DESeq2 and EdgeR. Enriched gene ontology terms were determined with the WEB-based GENE SeT AnaLysis (Webgestalt) toolkit using significantly differentially expressed genes (FDR >0.1) with a fold change  $\geq |1.5|$ .

**c** Overlap of differentially expressed genes between *Atp11a*, *Smg9* and *Ssr2* KO placentas. **d** Gene ontology enrichments of differentially expressed genes shared between KO placentas of the three mouse lines, determined using Metascape (<https://metascape.org>). Source data are provided as a Source Data file.

**a**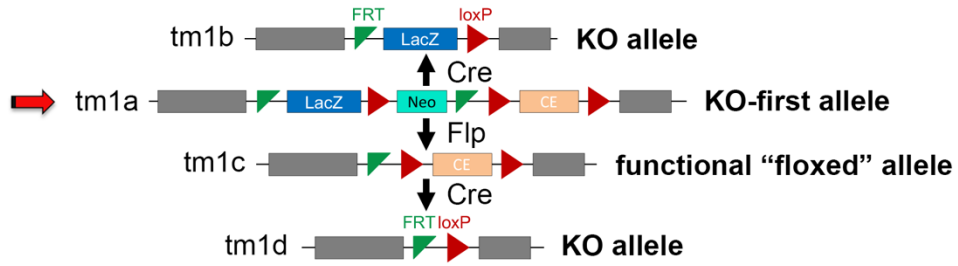**b**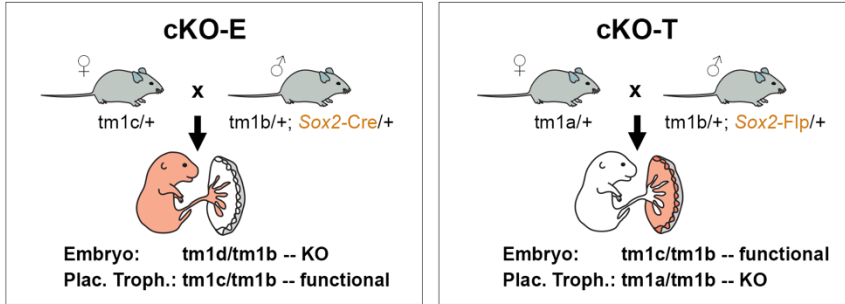**c**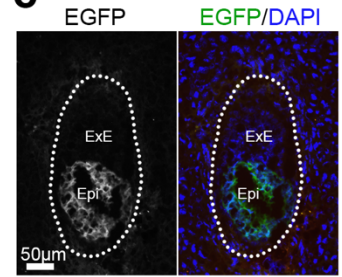**d**

CAG-FRT-Stop-FRT-EGFP reporter

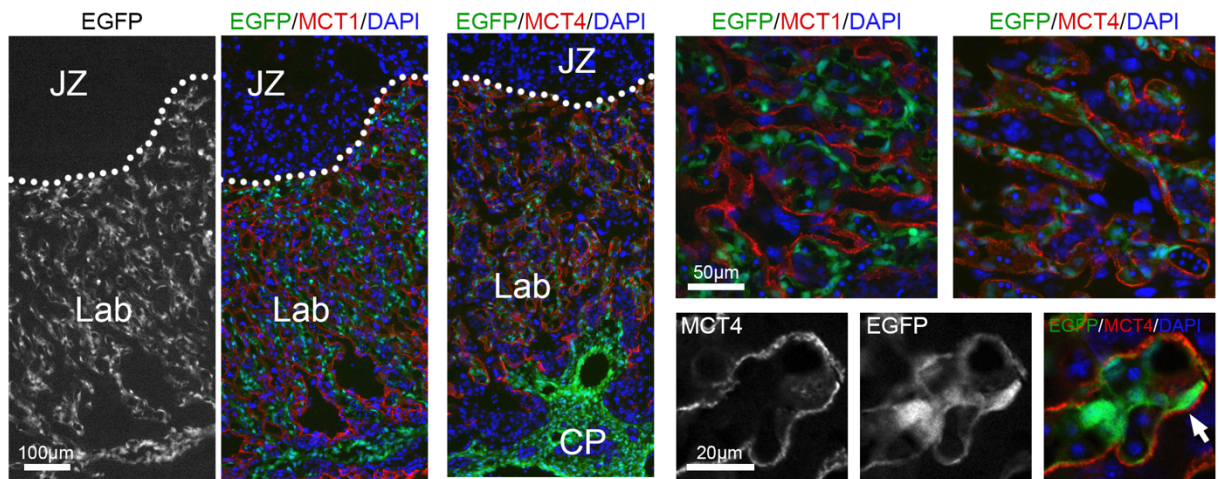**e**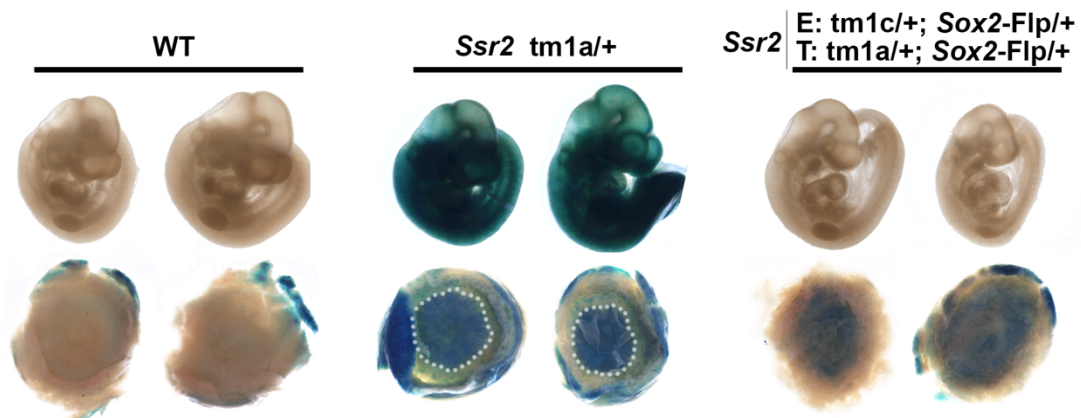**f**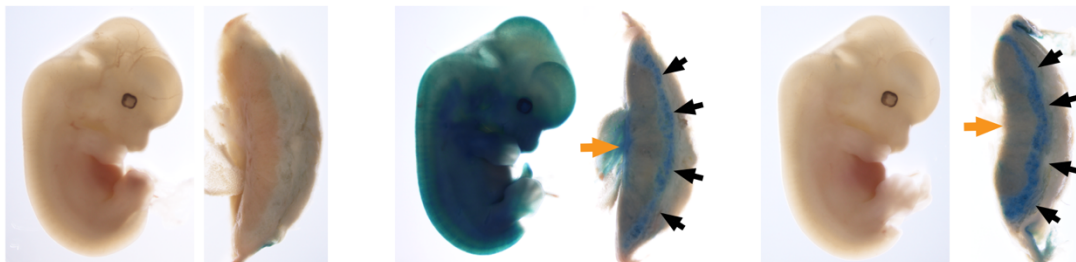

### Supplementary Figure 3. Conditional knockout strategies.

**a** Diagram of the EUCOMM/KOMP allele structures. Starting from the knockout-first tm1a allele (red arrow) in which LacZ serves as a readout of endogenous gene expression, exposure to Cre recombinase generates a constitutive KO tm1b allele. By contrast, exposure to FLP recombinase excises the LacZ-Neo cassette and generates a functional, “conditional-ready” tm1c allele, thereby restoring gene function in tissues where Flp is expressed. Subjecting the tm1c allele to Cre recombinase generates a constitutive KO tm1d allele. CE = critical exon. **b** Breeding strategy to generate embryo-specific (cKO-E) and trophoblast-specific (cKO-T) conditional knockout conceptuses. The pink shading demarcates gene ablation either in the embryo and in the allantoic (extra-embryonic) mesoderm-derived endothelial cells of fetal blood vessels in the placental labyrinth for cKO-E, or in the trophoblast components of the placenta only (cKO-T). The rendering of the embryo-placenta schematic is from Perez-Garcia et al., Placentation defects are highly prevalent in embryonic lethal mouse mutants. *Nature* 555, 463-468 (2018). **c** Cryosection of an E5.5 conceptus derived from a cross between a FLP reporter female and Sox2-Flp male. Epiblast (Epi) cells express enhanced green fluorescent protein (EGFP) as an indicator of FLP activity, whereas trophoblast cells of the extra-embryonic ectoderm (ExE) remain EGFP-negative. **d** E12.5 placentas of FLP reporter females that express EGFP in cells in which FLP was active, as a readout of Sox2-Flp transgene expression. Overview images show EGFP-positive cells in the placental labyrinth (Lab) but not in the junctional zone (JZ), as expected. Chorionic plate (CP) mesoderm as a derivative of extra-embryonic mesoderm is EGFP-positive, as expected. Higher magnification images verify the close juxtaposition but non-overlap between EGFP, MCT1 (=SynT-I) and MCT4 (=SynT-II), indicating that Sox2-Flp activity is confined to fetal endothelial cells in the labyrinth which are of extra-embryonic mesoderm origin (arrow). Images are representative of n=4 placentas. **e** Verification of non-mosaic activity of Sox2-Flp transgenic mouse lines, assessed by using the *Ssr2* tm1a allele as a reporter, which is ubiquitously expressed throughout the entire embryo (see Suppl. Fig. 1b). Epiblast-specific expression of FLP recombinase upon male transmission of the Sox2-Flp transgene causes complete conversion of the LacZ-positive (blue) tm1a allele into the LacZ-negative tm1c allele in all cells of the E10.5 embryo. LacZ is also correctly lost in the fetal placental vasculature (white dotted line), whereas the blue staining in the underlying trophoblast compartment is still visible. **f** Whole-mount LacZ stainings of E12.5 embryos and placentas of *Ssr2* (tm1a/+) x Sox2-Flp crosses. Retention of blue staining in the junctional zone (black arrows) demonstrates that ectopic Sox2-Flp expression in trophoblast derivatives is minimal or absent. The orange arrow points to fetal vasculature of the yolk sac and chorionic plate mesoderm which correctly loses LacZ activity in conceptuses that carry the Sox2-Flp transgene. Genotypes of embryos and placentas align with those in **e**.

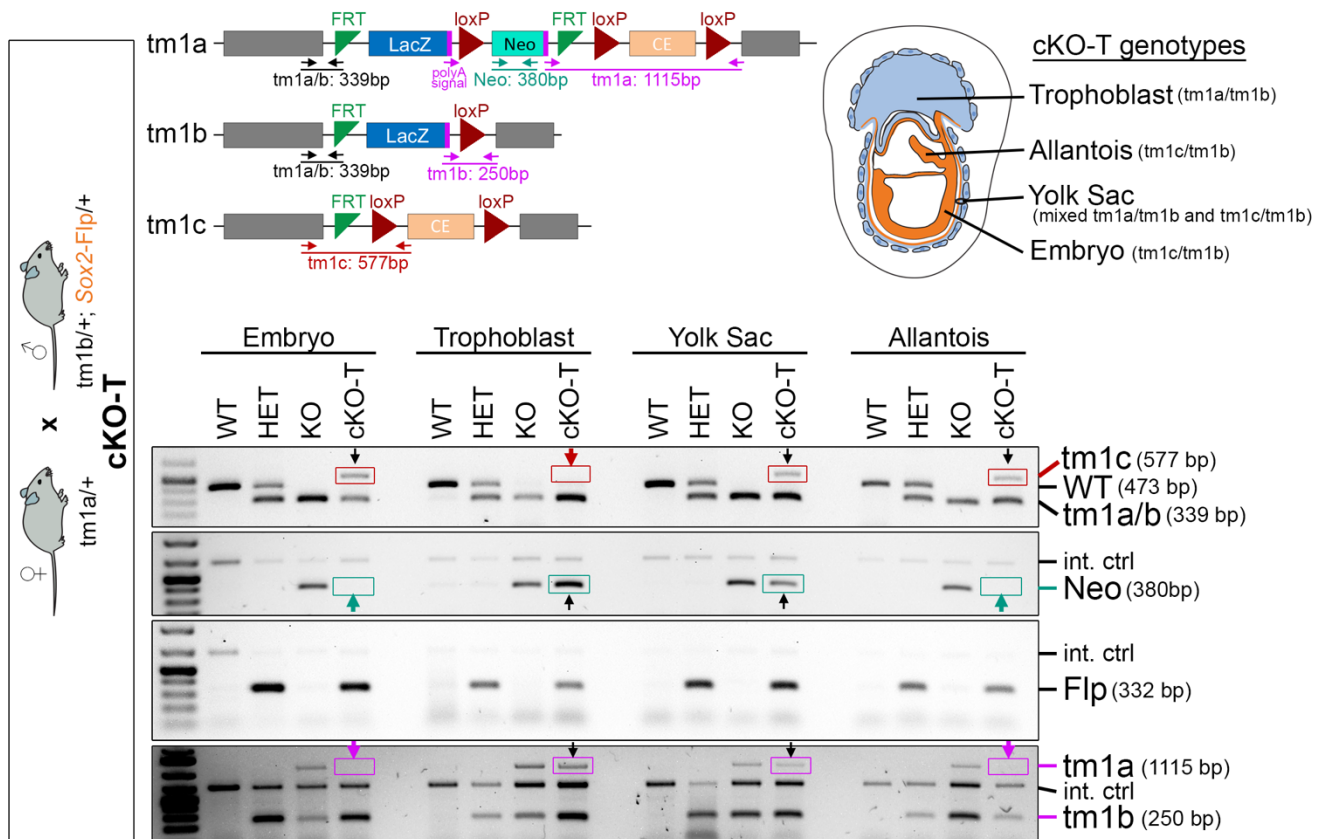

**Supplementary Figure 4. Detailed genotyping to verify the lineage-specificity of Sox2-Flp activity.**

Detailed genotyping confirmation on fine-dissected E8.5 conceptuses to verify the complete conversion of alleles mediated by Sox2-Flp. The cross is detailed in the box. Relevant alleles and primer locations are depicted. Tissues dissected and their lineage origin are as follows: Embryo and allantois are epiblast-derived tissues in which Sox2-Flp is active and consequently the tm1a allele is converted to the functional tm1c allele; Yolk Sac is of mixed lineage origin (extra-embryonic mesoderm: Sox2-Flp active, tm1a->tm1c; and primitive endoderm: Sox2-Flp inactive, tm1a); trophoblast originates from the trophoctoderm and is negative for Sox2-Flp activity (tm1a). Conceptuses of informative genotypes were selected for PCR genotyping. Critical bands are highlighted by boxes that are colour-coded for the specific primer pair used. Coloured arrows point to the important changes in the presence or absence of bands.

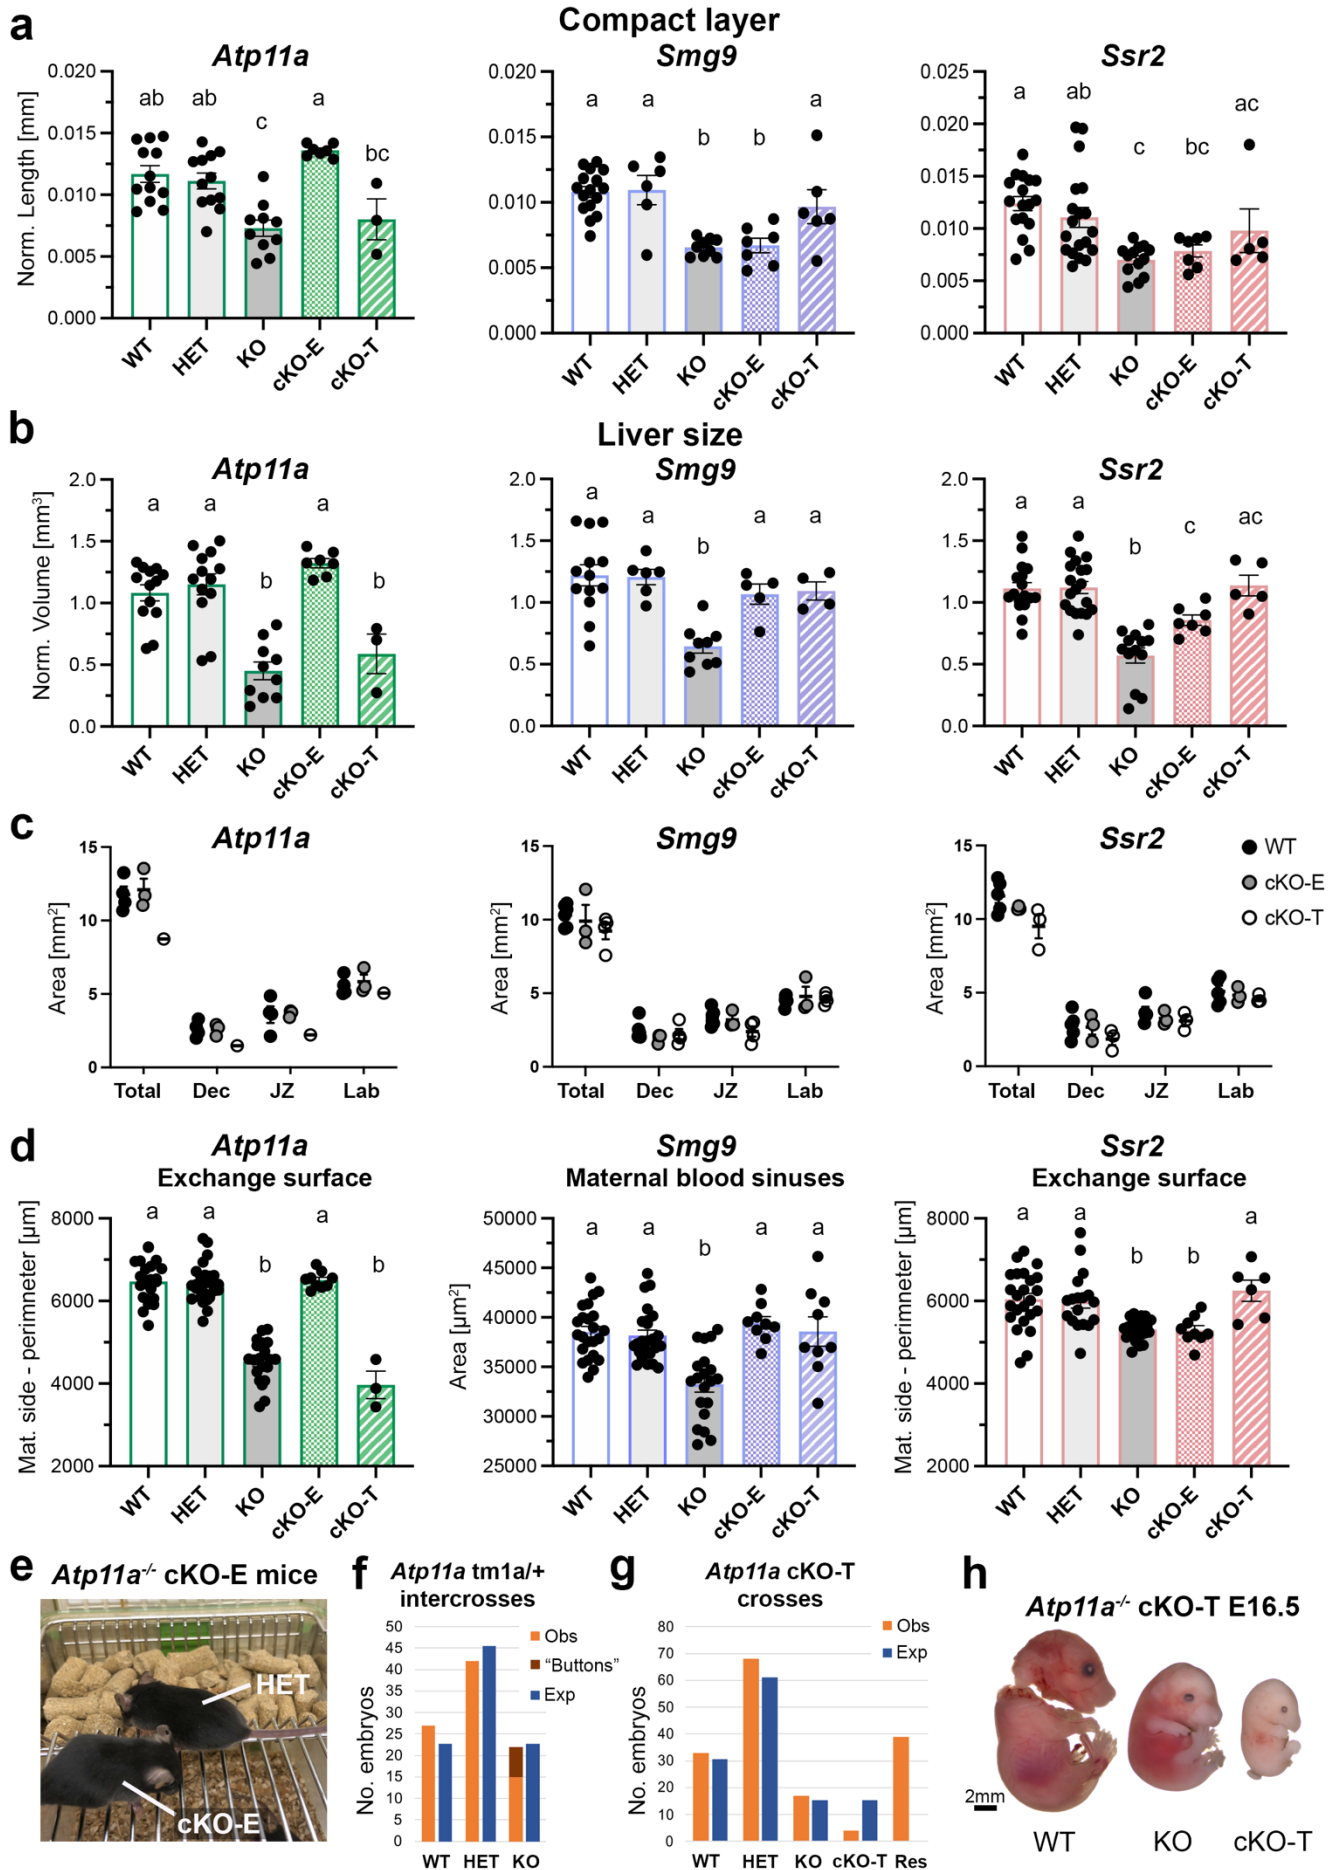



### Supplementary Figure 5. Conditional knockout phenotypes.

**a** and **b** Additional quantifications of heart and liver phenotypes based on 3D  $\mu$ CT imaging analyses. Measurements were taken from individual control (WT/HET) and KO (KO, cKO) embryos matched across litters for *Atp11a* (WT n=12, HET n=12, KO n=10, cKO-E n=7, c-KO-T n=3), *Smg9* (WT n=16, HET n=6, KO n=9, cKO-E n=7, c-KO-T n=6), *Ssr2* (WT n=17, HET n=19, KO n=13, cKO-E n=7, c-KO-T n=5). Data are displayed as mean  $\pm$  SEM. Statistical analysis by one-way ANOVA with Holm-Šídák's multiple comparisons test. **c** Placental area measurements of WT, cKO-E and cKO-T placentas of each line, based on *Tpbpa*-demarcated decidual (Dec), junctional zone (JZ) and labyrinth (Lab) dimensions. Statistical analysis was performed using two-way ANOVA with Tukey's multiple comparisons test. Although no statistically significant differences were observed, *Atp11a*, *Smg9* and *Ssr2* cKO-T placental total areas tend to be smaller. Data are displayed as mean  $\pm$  SEM from *Atp11a* (WT n=4, cKO-E n=3, c-KO-T n=1), *Smg9* (WT n=6, cKO-E n=3, c-KO-T n=4), *Ssr2* (WT n=5, cKO-E n=3, c-KO-T n=3) placentas. **d** Analysis of placental parameters in cKO-E and cKO-T conceptuses that were fundamentally altered in the constitutive KOs. For *Atp11a* and *Ssr2*, the cKO-E and cKO-T constellation, respectively, restores placental morphology to normal, whereas the reverse cKO-T and cKO-E placentas exhibit the phenotypic alterations at full severity. The *Smg9* data reveal that the constitutive KO is a result of additive or synergistic gene function in both, the embryonic and trophoblast compartments. Placental pathology (and heart phenotype, Fig. 3) is improved in both, the cKO-E and cKO-T conditional scenarios. Data are displayed as mean  $\pm$  SEM from *Atp11a* (WT n=8, HET n=9, KO n=7, cKO-E n=3, c-KO-T n=1), *Smg9* (WT n=8, HET n=8, KO n=7, cKO-E n=3, c-KO-T n=3), *Ssr2* (WT n=8, HET n=6, KO n=8, cKO-E n=3, c-KO-T n=2) individual placentas, each measured on n=3 areas. Statistical analysis was performed with one-way ANOVA with Tukey's multiple comparisons test. **e** Picture of adult mice heterozygous and homozygous mutant for *Atp11a*, the latter a result of placental rescue in a cKO-E conceptus. *Atp11a*-null mice rescued by a functional placenta are indistinguishable from WT and HET littermates, healthy and fertile. **f** Genotype distribution of E14.5 *tm1a*<sup>+/+</sup> HETxHET intercrosses. About one-third of *tm1a*/*tm1a* KO conceptuses were already moribund and their placentas appeared severely bloodless and flattened, which were termed "buttons". **g** Breeding performance and allele distribution in crosses designed to obtain *Atp11a* cKO-T conceptuses. Unlike in any of the other strains, *Atp11a* cKO-T conceptuses were highly underrepresented at E14.5. Res = resorptions. **h** *Atp11a* WT, constitutive KO and cKO-T embryos recovered at E16.5. The cKO-T embryo is even more severely affected than the constitutive KO, and dead at this stage. This proves that *Atp11a* gene function is exclusively required in the trophoblast lineage for normal heart development and embryonic survival to term. WT and HET embryos were decapitated at this stage in compliance with animal use protocols. Source data are provided as a Source Data file. All exact *p*-values are provided in Supplementary Data 1.

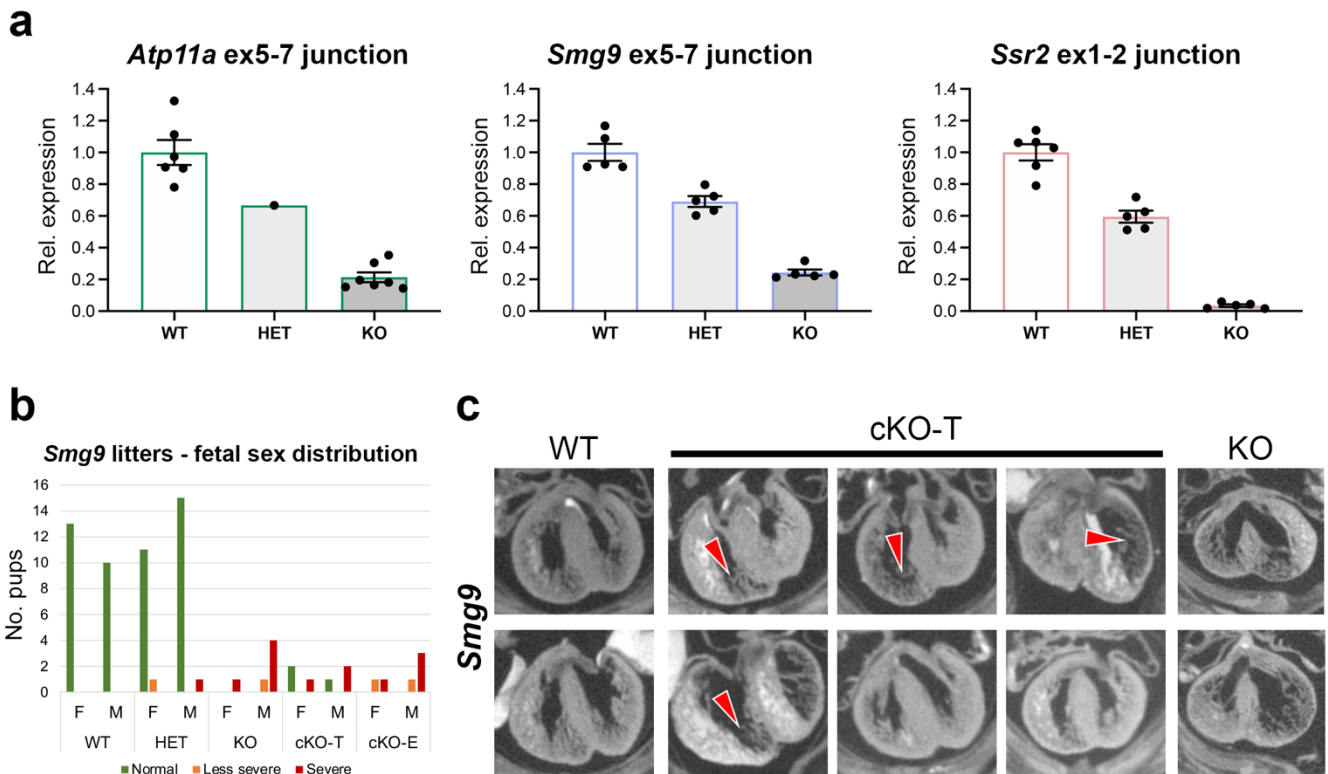

**Supplementary Figure 6. Knockout alleles and additional phenotyping data for *Smg9* conditional knockouts.**

**a** RT-qPCRs across *Atp11a* exons 5-7, *Smg9* exons 5-7 and *Ssr2* exons 1-2. In the *tm1a* allele, these exons are separated by the LacZ-Neo cassette, precluding the amplification of a PCR product (see Supplementary Fig. 1d). Detection of ~20% product in *Atp11a* and *Smg9* KO (*tm1a/tm1a*) placentas indicates spurious splicing events across the cassette to produce functional *transcript*. Data are displayed as mean +/- SEM. *Atp11a*: WT n=6, HET n=1, KO n=7; *Smg9*: WT n=5, HET n=5, KO n=5; *Ssr2*: WT n=5, HET n=5, KO n=5. **b** Sex-specific distribution of *Smg9* conceptuses of the indicated genotypes. No sex-specific correlation of phenotype severity was observed. **c** Coronal  $\mu$ CT sections through the hearts of *Smg9* embryos reveal the large variability in heart pathologies of cKO-T embryos compared to the constitutive KO. Source data are provided as a Source Data file.

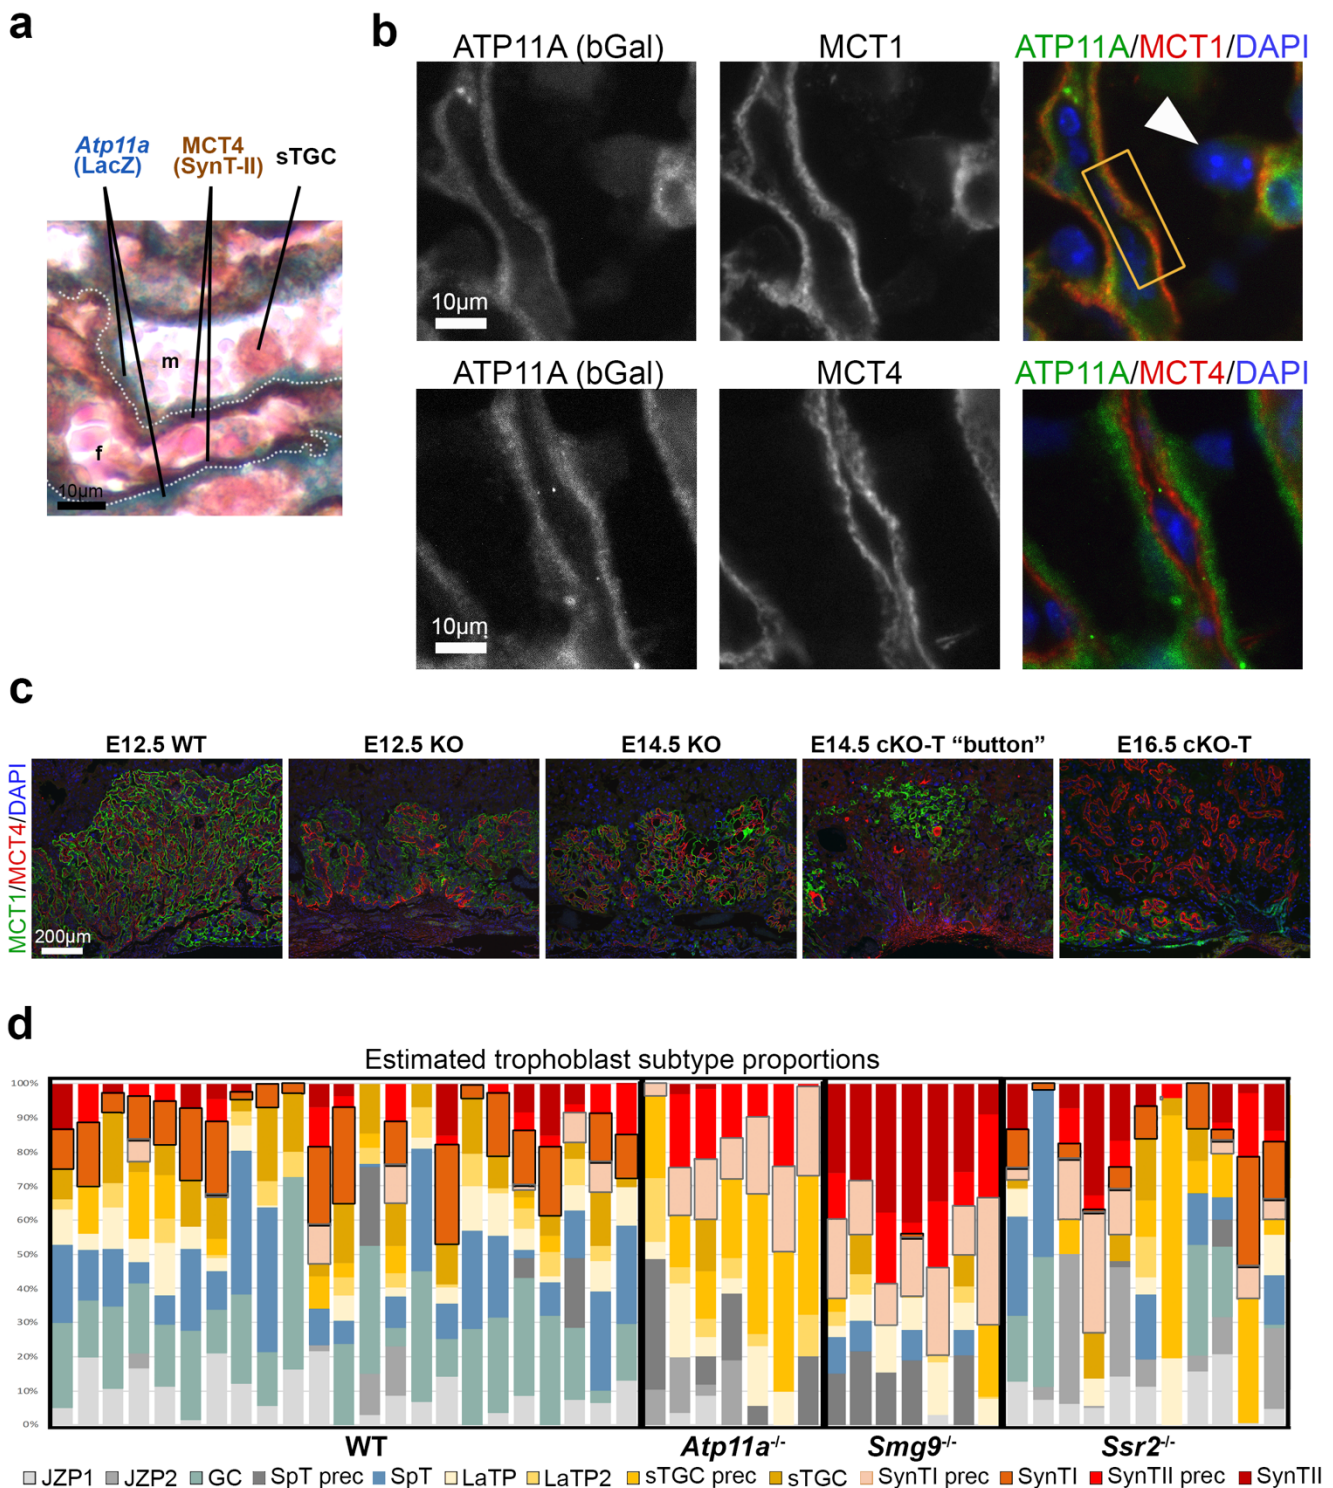

**Supplementary Figure 7. Placental ATP11A expression and phenotype analysis.**

**a** Double staining for LacZ (blue) as indicator of *Atp11a* expression and for MCT4 as marker of the syncytiotrophoblast layer-II (SynT-II) shows that ATP11A is confined to SynT-I. Staining is representative of n=6 placentas. **b** Double immunofluorescence stainings for beta-galactosidase (bGal) as indicator of ATP11A expression (green) and for MCT1 or MCT4 (red) as markers of SynT-I and SynT-II, respectively. ATP11A and MCT1 staining fully overlap in the syncytial layer, whereas ATP11A and MCT4 signals are closely juxtaposed but non-overlapping. These double stainings

demonstrate that ATP11A is confined to SynT-I. The arrowheads point to sTGC cells that are consistently negative for ATP11A expression. Stainings are representative of n=3 placentas. **c** MCT1 and MCT4 double immunofluorescence stainings on *Atp11a* placentas of the indicated genotypes recovered from E12.5 litters, and from moribund E14.5 cKO-T “buttons” (see Supplementary Fig. 5f) and E16.5 conceptuses (see Supplementary Fig. 5h). In the moribund conceptuses, the organization of the two syncytial layers that are normally closely juxtaposed is entirely lost. **d** Virtual deconvolution of placental RNA-seq data for cell type-specific composition<sup>2,3</sup> reveals an under-representation of mature SynT-I in all mutant placentas. Each bar represents an individual placenta, with absolute values of the proportional cell type composition being depicted. GC=glycogen cell, JZP=Junctional zone precursor, LaTP=Labyrinth precursor, SpT=spongiotrophoblast, sTGC=sinusoidal trophoblast giant cell. Source data are provided as a Source Data file.

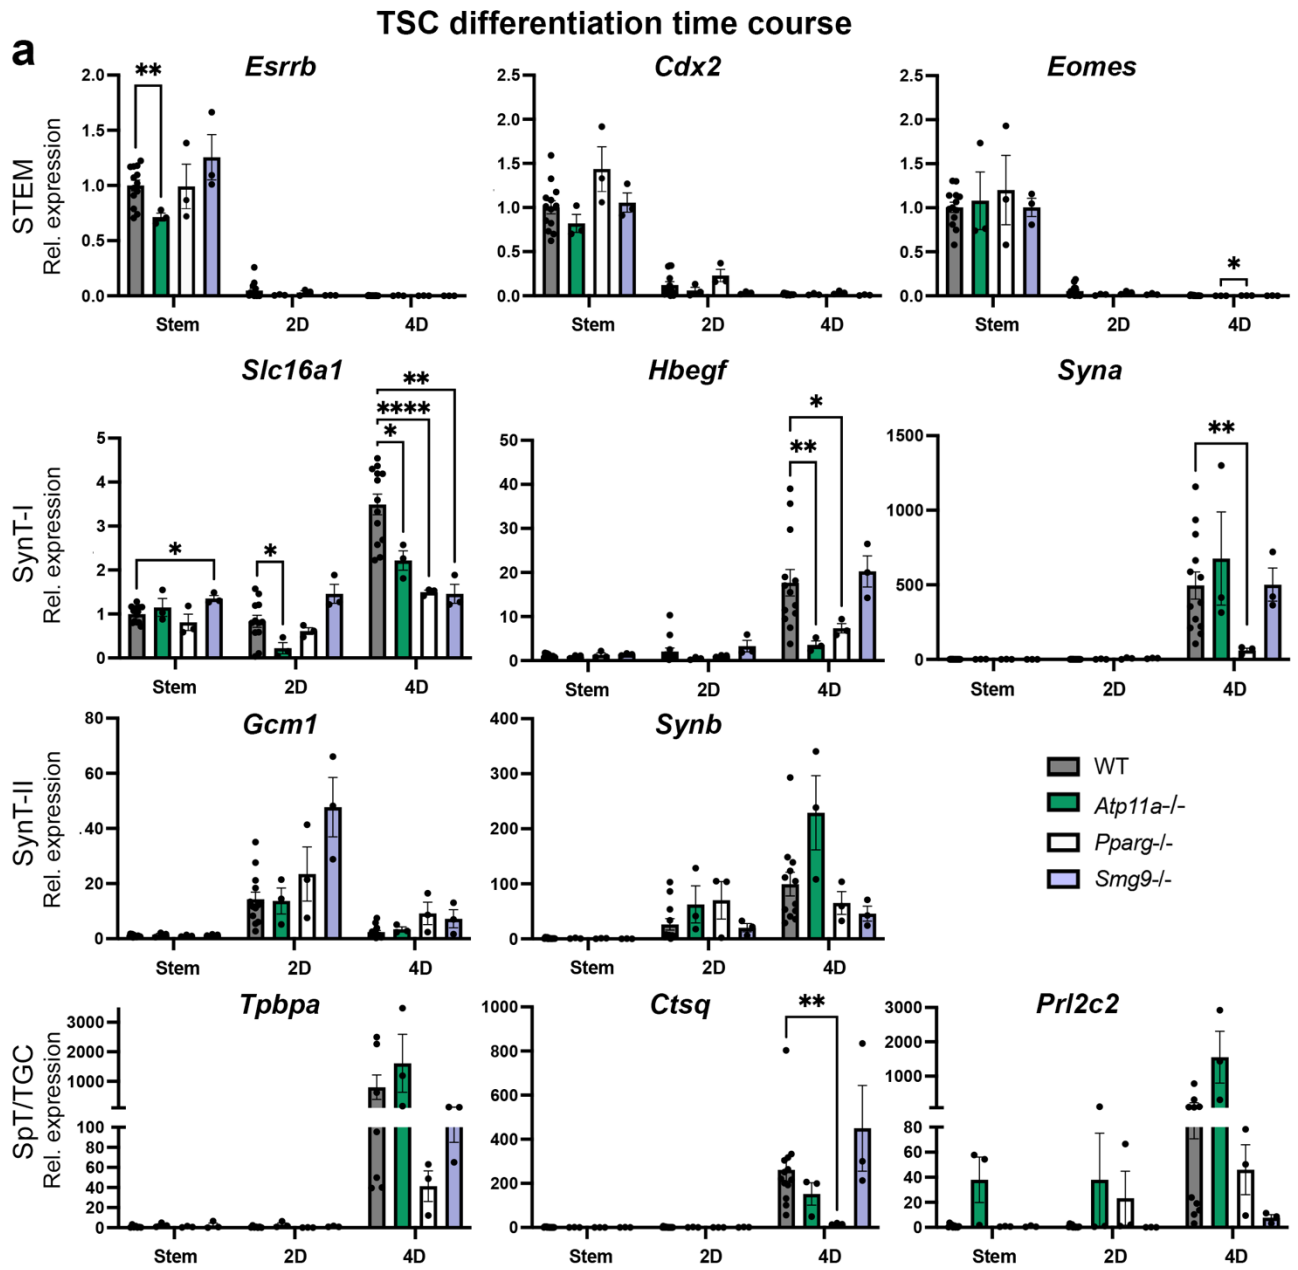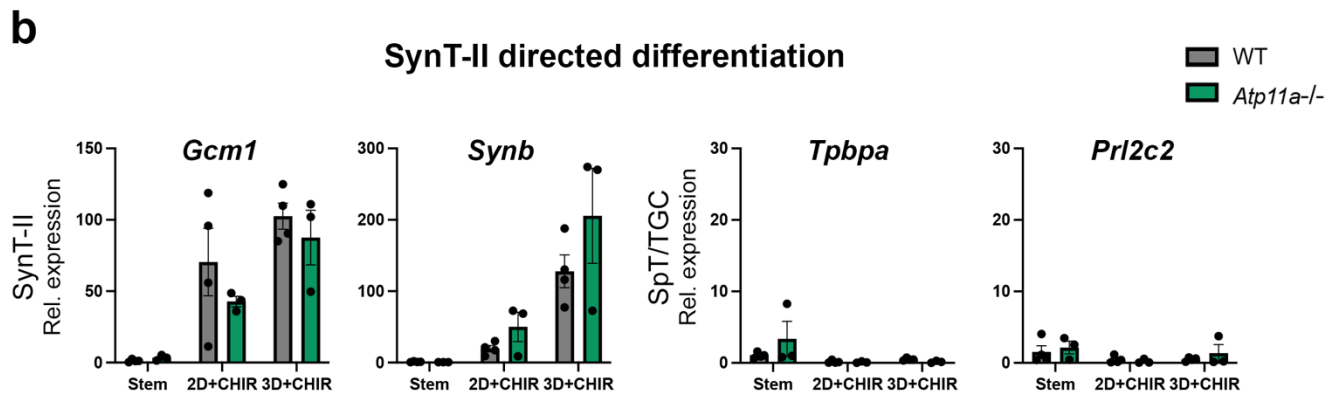

**Supplementary Figure 8. Trophoblast marker gene expression in KO trophoblast stem cells (TSCs).**

**a** Trophoblast cell type-specific marker gene expression analysis across a 4-day differentiation time course by RT-qPCR in TSCs ablated for *Atp11a*, *Pparg* and *Smg9* (n=3 independent KO TSC clones for each genotype), compared to WT (n=13, except for genes *Tpbpa* (n=7), *Pr12c2* (n=10) and *Synb* (n=12)). Data are normalized to expression levels of WT cells in stem cell conditions (Stem) and displayed as mean +/- SEM. Statistical analysis was performed using two-way ANOVA and Tukey's multiple comparison test. \*  $p < 0.05$ , \*\*  $p < 0.01$ . **b** Directed TSC differentiation experiment in the presence of CHIR99021, which specifically promotes SynT-II differentiation while suppressing differentiation into any other trophoblast cell type. No differences in SynT-II differentiation were observed in *Atp11a*<sup>-/-</sup> TSCs compared to WT controls. SpT/TGC marker genes are displayed relative to 50% expression levels at 3D standard differentiation, to visualize the comparative lack of induction of these markers. Data are mean +/- SEM of n=4 (WT) and n=3 (*Atp11a* KO) TSC clones per genotype. Statistical analysis was performed using two-way ANOVA and Tukey's multiple comparison test. SpT = spongiotrophoblast, TGC = trophoblast giant cell. Source data are provided as a Source Data file. All exact  $p$ -values are provided in Supplementary Data 1.

## Extended TSC Differentiation Time Course

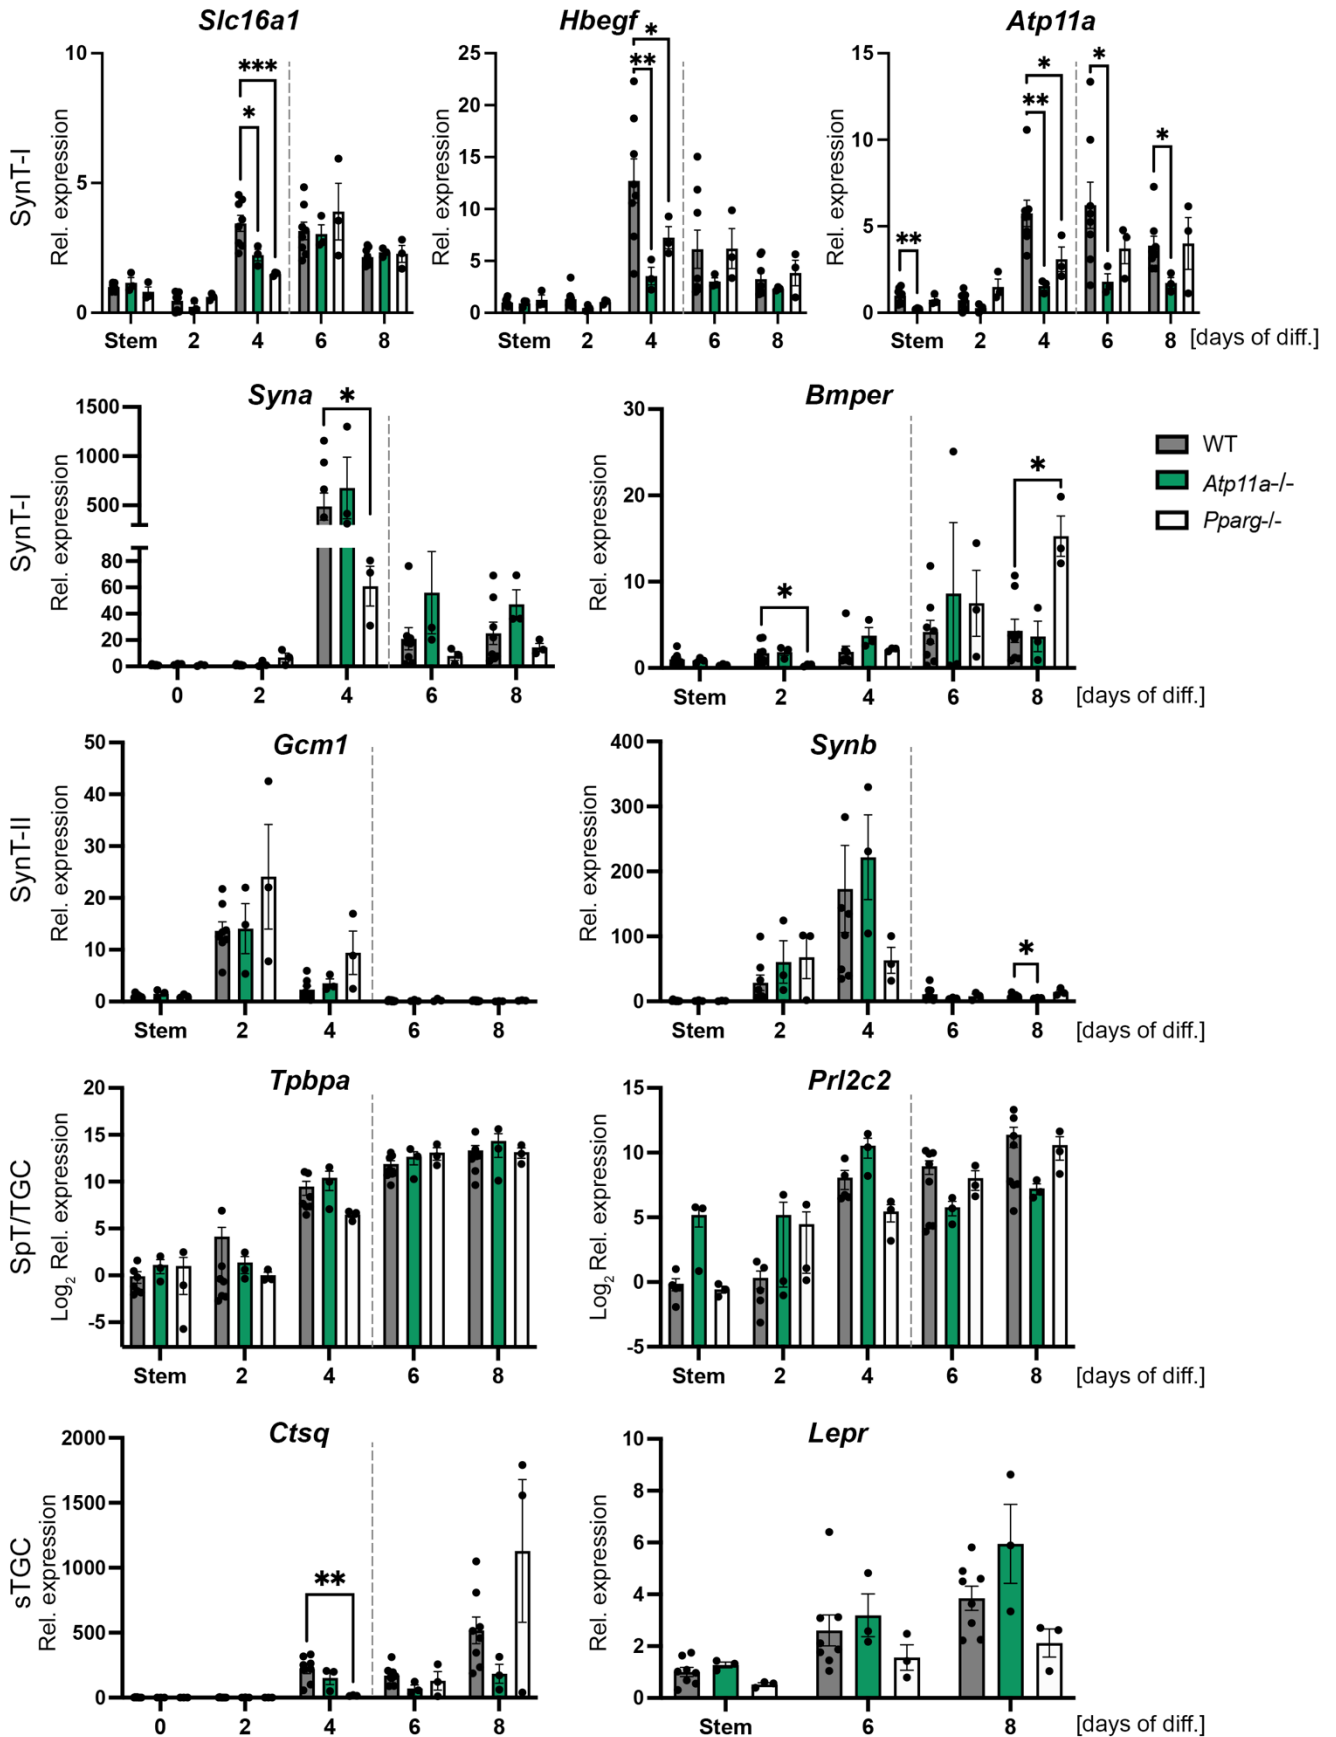

### **Supplementary Figure 9. Trophoblast marker gene expression in KO trophoblast stem cells (TSCs).**

Trophoblast cell type-specific marker gene expression analysis across an extended 8-day (8D) differentiation time course by RT-qPCR in TSCs ablated for *Atp11a* and *Pparg*, compared to WT. Stem-to-4D differentiation conditions were designed to test for syncytialization differences; the 6D-8D time points were specifically designed to detect differences in other, non-syncytial cell types by optimizing initial plating cell numbers so not to reach confluence and not to require passaging throughout the entire time course, a procedure that always results in loss of the extremely adherent trophoblast giant cells. Thus, cell seeding numbers in 6-well plates were higher for the 2D and 4D time points (50,000 cells), and lower for the 6D (25,000 cells) and 8D time points (15,000 cells); this difference is indicated by the dotted line. While this may obscure SynT differentiation differences at 6D and 8D (because of low cell densities during the early period that is critical for syncytial formation), the approach was designed to be specifically sensitive for detecting differentiation biases in cells of the giant cell lineage. No such differences were observed between WT and KO TSC lines. Data are normalized to expression levels of WT cells in stem cell conditions (Stem) and displayed as mean +/- SEM of WT: n=8 and KO: n=3 independent TSC clones per genotype. Statistical analysis was performed using two-way ANOVA and Tukey's multiple comparison test. \*  $p < 0.05$ , \*\*  $p < 0.01$ , \*\*\*  $p < 0.001$ . Source data are provided as a Source Data file. All exact  $p$ -values are provided in Supplementary Data 1.



**a**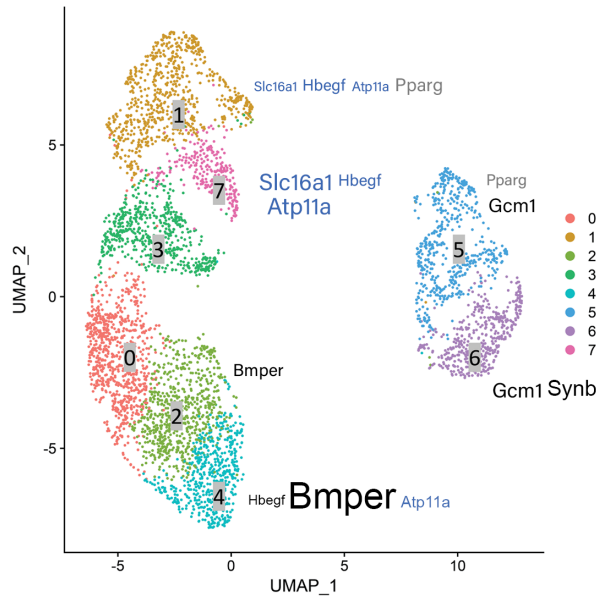**b**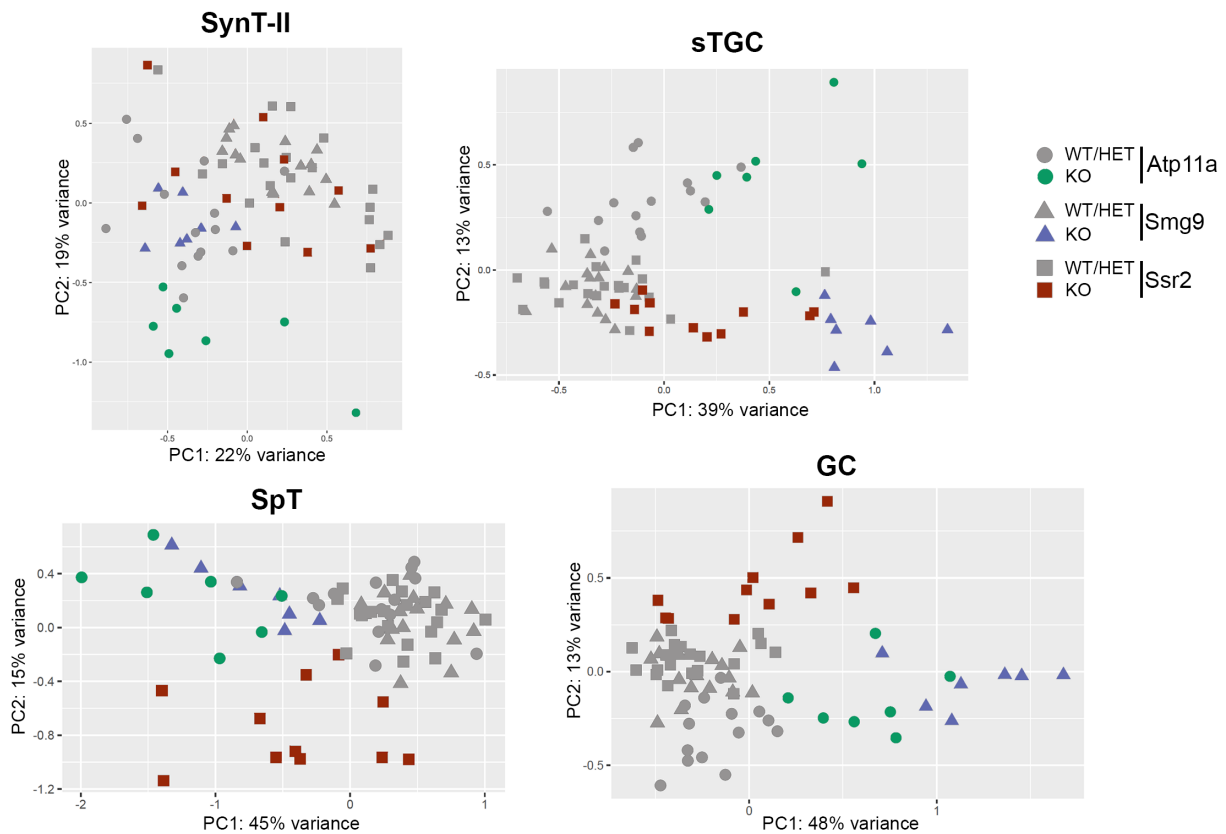

### Supplementary Figure 10. Trophoblast marker gene expression in KO trophoblast stem cells (TSCs).

**a** UMAP plot of snRNA-seq data from Marsh and Blelloch, 2020<sup>2</sup> after specifically filtering on syncytiotrophoblast-specific nuclei from all developmental stages (E9.5-E14.5). SynT-I (left-hand side) and SynT-II cell nuclei cluster into two distinct groups. Moreover, SynT-I nuclei can be separated into subclusters in which subclusters 1 and 7 are demarcated by higher co-expression of *Atp11a*, *Slc16a1* (= *Mct1*), *Hbegf*, and *Pparg*. The font size of genes depicts relative expression (FC)\*10. **b** Principal component analyses of bulk placental RNA-seq data filtered for SynT-II, sTGC,

spongiotrophoblast (SpT) and glycogen cell (GC) marker genes<sup>2</sup>. Unlike SynT-I expression patterns (Fig. 5f), none of these markers separate the KO samples as distinctly and clearly away from unaffected WT and HET samples.

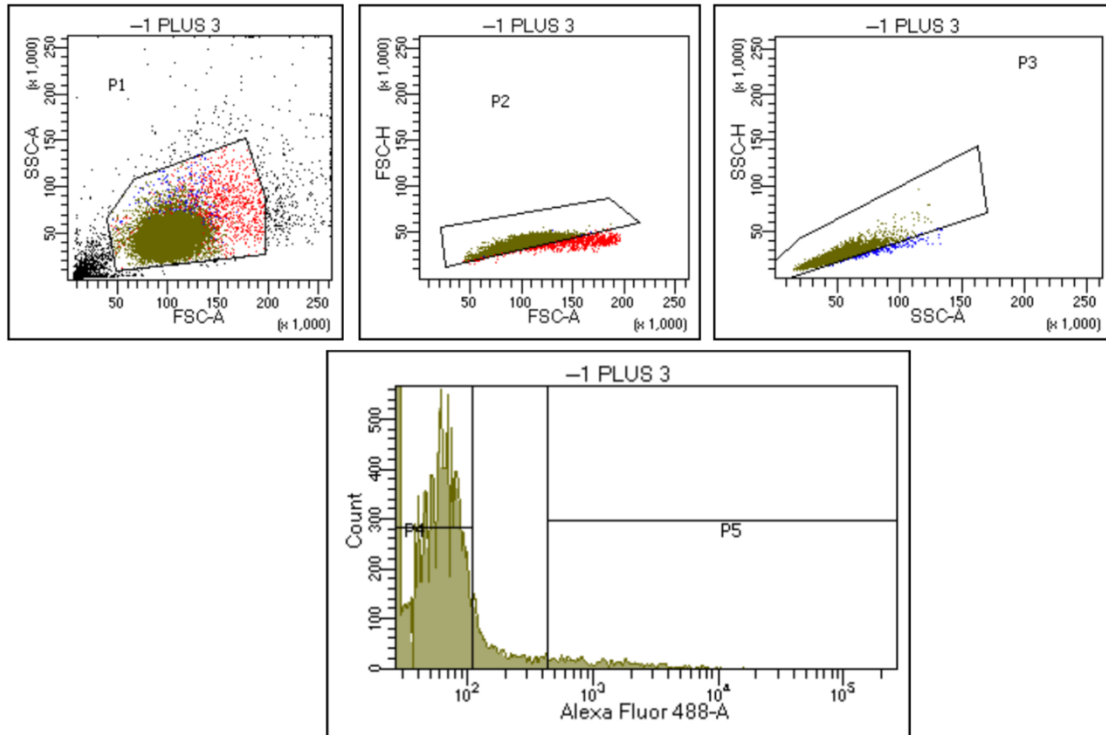

| Experiment Name: | HEMBERGER-BETH-GFP-130-... |         |            |              |
|------------------|----------------------------|---------|------------|--------------|
| Specimen Name:   | -                          |         |            |              |
| Tube Name:       | 1 PLUS 3                   |         |            |              |
| Record Date:     | May 3, 2021 10:05:47 AM    |         |            |              |
| Population       | #Events                    | %Parent | FSC-A Mean | FSC-A Median |
| All Events       | 18,418                     | ###     | 100,225    | 100,893      |
| P1               | 16,579                     | 90.0    | 103,842    | 101,987      |
| P2               | 15,037                     | 90.7    | 100,626    | 100,515      |
| P3               | 14,644                     | 97.4    | 100,323    | 100,311      |
| P4               | 11,817                     | 80.7    | 100,446    | 100,477      |
| P5               | 1,307                      | 8.9     | 97,257     | 96,861       |

| Tube: 1 PLUS 3 |         |         |        |
|----------------|---------|---------|--------|
| Population     | #Events | %Parent | %Total |
| All Events     | 18,418  | ###     | 100.0  |
| P1             | 16,579  | 90.0    | 90.0   |
| P2             | 15,037  | 90.7    | 81.6   |
| P3             | 14,644  | 97.4    | 79.5   |
| P4             | 11,817  | 80.7    | 64.2   |
| P5             | 1,307   | 8.9     | 7.1    |

**Supplementary Figure 11. Flow sort strategy for single cell cloning of CRISPR-Cas9 transfected TSCs.**

Example of flow sorting strategy to enrich for transfected, EGFP-positive TSCs in the KO generation strategy. Population P4 = negative; Population P5 = EGFP-positive.

**Supplementary Table 1:  $\mu$ CT measurements**

| Mouse Line | Measurement             | Units               | WT-Mean | WT-SEM | KO-Mean | KO-SEM | <i>p</i> adj |
|------------|-------------------------|---------------------|---------|--------|---------|--------|--------------|
| Atp11a     | Embryo Length           | mm                  | 10.15   | 0.414  | 9.053   | 0.3257 | 0.0148       |
|            | Liver Volume            | mm <sup>3</sup> /mm | 1.057   | 0.100  | 0.414   | 0.0746 | <0.0001      |
|            | Ventricular Space       | mm <sup>3</sup> /mm | 0.0067  | 0.002  | 0.016   | 0.0012 | 0.008        |
|            | Septal Hole             | mm/mm               | 0       | 0      | 0.014   | 0.0030 | 0.0042       |
|            | Compact layer           | mm/mm               | 0.0099  | 0.0004 | 0.008   | 0.0006 | 0.031        |
|            | Trabecular Layer        | mm/mm               | 0.0280  | 0.0012 | 0.023   | 0.0007 | 0.5485       |
|            | Cardiac Muscle Volume   | mm <sup>3</sup> /mm | 0.1933  | 0.0063 | 0.006   | 0.0128 | 0.1899       |
|            | Ventricle Muscle Volume | mm <sup>3</sup> /mm | 0.1214  | 0.004  | 0.141   | 0.0069 | 0.2238       |
|            | Septum Width            | mm/mm               | 0.0405  | 0.0032 | 0.030   | 0.0026 | 0.0953       |
|            | Heart Rotation          | voxels              | 27.30   | 3.081  | 22.15   | 3.469  | 0.2860       |
| Smg9       | Embryo Length           | mm                  | 10.89   | 0.279  | 9.474   | 0.1446 | 0.0005       |
|            | Liver Volume            | mm <sup>3</sup> /mm | 1.233   | 0.084  | 0.645   | 0.0548 | <0.0001      |
|            | Ventricular Space       | mm <sup>3</sup> /mm | 0.0032  | 0.001  | 0.017   | 0.0029 | <0.0001      |
|            | Septal Hole             | mm/mm               | 0       | 0      | 0.020   | 0.0029 | <0.0001      |
|            | Compact layer           | mm/mm               | 0.0114  | 0.0004 | 0.007   | 0.0002 | <0.0001      |
|            | Trabecular Layer        | mm/mm               | 0.0270  | 0.0016 | 0.002   | 0.0025 | 0.9861       |
|            | Cardiac Muscle Volume   | mm <sup>3</sup> /mm | 0.2227  | 0.0137 | 0.190   | 0.0117 | 0.8981       |
|            | Ventricle Muscle Volume | mm <sup>3</sup> /mm | 0.1279  | 0.006  | 0.122   | 0.0069 | 0.9840       |
|            | Septum Width            | mm/mm               | 0.0447  | 0.0023 | 0.032   | 0.0027 | 0.0085       |
|            | Heart Rotation          | voxels              | 36.69   | 2.113  | 54.03   | 6.371  | 0.0152       |
| Ssr2       | Embryo Length           | mm                  | 10.09   | 0.173  | 9.270   | 0.1864 | 0.0167       |
|            | Liver Volume            | mm <sup>3</sup> /mm | 1.116   | 0.059  | 0.587   | 0.0723 | <0.0001      |
|            | Ventricular Space       | mm <sup>3</sup> /mm | 0.0024  | 0.001  | 0.013   | 0.0018 | 0.0005       |
|            | Septal Hole             | mm/mm               | 0       | 0      | 0.015   | 0.0039 | 0.0003       |
|            | Compact layer           | mm/mm               | 0.0128  | 0.0006 | 0.007   | 0.0003 | <0.0001      |
|            | Trabecular Layer        | mm/mm               | 0.0298  | 0.001  | 0.029   | 0.0018 | 0.9164       |
|            | Cardiac Muscle Volume   | mm <sup>3</sup> /mm | 0.1931  | 0.0039 | 0.188   | 0.0069 | 0.56218      |
|            | Ventricle Muscle Volume | mm <sup>3</sup> /mm | 0.1197  | 0.004  | 0.120   | 0.0030 | 0.9997       |
|            | Septum Width            | mm/mm               | 0.0485  | 0.0018 | 0.034   | 0.0025 | 0.0006       |
|            | Heart Rotation          | voxels              | 30.17   | 3.101  | 21.80   | 4.117  | 0.0994       |

Statistical analyses were performed by one-way ANOVA with Holm-Šídák's multiple comparisons test.

**Supplementary Table 2:** Detailed description of heart pathologies observed in mutant embryos.

| Mouse Line | ID  | VSD subcategory                            |
|------------|-----|--------------------------------------------|
| Atp11a-KO  | 1b  | OA, pmVSD                                  |
|            | 1c  | OA, pmVSD                                  |
|            | 1d  | OA, pmVSD                                  |
|            | 1e  | Mild VSD/OA (or delayed closure of septum) |
|            | 3d  | OA, pmVSD                                  |
|            | 4a  | OA, pmVSD                                  |
|            | 10a | pmVSD                                      |
|            | 12b | OA, pmVSD                                  |
| Smg9-KO    | 2a  | OA, pmVSD                                  |
|            | 2d  | DORV, IAA-B                                |
|            | 4f  | Delayed closure of septum                  |
|            | 6f  | OA, pmVSD                                  |
|            | 7f  | EC defect (AVCD), OA, pmVSD                |
|            | 8g  | OA, pmVSD                                  |
|            | 9a  | OA, pmVSD                                  |
|            | 10d | OA, pmVSD, severe hypoplastic ventricle    |
|            | 10h | OA, pmVSD                                  |
| Ssr2-KO    | 7a  | AVCD, muscular and pmVSD, PTA + IAA-B      |
|            | 7b  | DORV, pmVSD                                |
|            | 8a  | DORV, IAA-B, pmVSD                         |
|            | 8c  | DORV, pmVSD                                |
|            | 8g  | OA, pmVSD                                  |
|            | 12b | Delayed closure of septum                  |
|            | 13c | DORV, hypoplastic AscAo, pmVSD             |
|            | 13f | DORV, pmVSD                                |
|            | 16f | DORV, pmVSD                                |
|            | 19d | OA, pmVSD                                  |
|            | 20a | DORV, IAA-B, pmVSD                         |
|            | 20c | OA, pmVSD                                  |

AscAo = ascending aorta; AVCD = atrioventricular canal defect; DORV = double outlet right ventricle (as defined by the IPCCC description and MedGen UID 41649 as “a congenital cardiovascular malformation in which both great arteries arise entirely or predominantly from the morphologically right ventricle”); EC = endocardial cushion; IAA-B = interrupted aortic arch type B; OA = overriding aorta (as defined based on MedGen UID 120559 as “a congenital heart defect where the aorta is positioned directly over a ventricular septal defect”); pmVSD = perimembranous ventricular septal defect. “Delayed closure of septum” was assigned when there was no overt connection between the ventricles but 1-2  $\mu$ CT image frames showed a very small hole in the high resolution scans. This is indicative of small pmVSDs that would be likely to close spontaneously with further gestational growth.

**Supplementary Table 3:** Guide RNA and primer sequences.

*gRNA sequences*

| Target | Name  | Strand    | Sequence (5'-3')           |
|--------|-------|-----------|----------------------------|
| Atp11a | UP    | Sense     | CACCGCCAGAAACCAGGTGCCGTG   |
|        |       | Antisense | AAACCACGGCACCTGGTTTCTGGC   |
|        | DOWN  | Sense     | CACCGCAGCTGGAGAGGCTCCACAC  |
|        |       | Antisense | AAACGTGTGGAGCCTCTCCAGCTGC  |
| Smg9   | UP    | Sense     | CACCGTCCACACTCACCCGCTCAGC  |
|        |       | Antisense | AAACGCTGAGCGGGTGAGTGTGGAC  |
|        | DOWN  | Sense     | CACCGGACCGTGAGTGAACCCAC    |
|        |       | Antisense | AAACGTGGGGTTCACCTCACGGTCCC |
| Pparg  | UP    | Sense     | CACCGTACTGTCTCAGAAGAGGCGC  |
|        |       | Antisense | AAACGCGCCTCTTCTGAGACAGTAC  |
|        | DOWN1 | Sense     | CACCGCATCTCAGTGGATCTTGCA   |
|        |       | Antisense | AAACCTGCAAGATCCACTGAGATGC  |
|        | DOWN2 | Sense     | CACCGATATTACAGCATTAGTCCAT  |
|        |       | Antisense | AAACATGGACTAATGCTGTAATATC  |

*Table of primers*

| Experiment             | Target                | Primer                         | Sequence (5'-3')               |
|------------------------|-----------------------|--------------------------------|--------------------------------|
| <b>Genotyping Mice</b> | Atp11a-tm1a/1c/1d     | FWD                            | CACGTCTGTGTTCTGTGTCC           |
|                        |                       | REV                            | TATTTGATGCACCTGCCCTG           |
|                        |                       | Cas1-R                         | TCGTGGTATCGTTATGCGCC           |
|                        | Ssr2-tm1a/1c/1d       | FWD                            | AGGCAGGGATAAATTCAGCTTG         |
|                        |                       | REV                            | TGACTGGAAAATCCACCTGC           |
|                        |                       | Cas1-R                         | TCGTGGTATCGTTATGCGCC           |
|                        | Smg9-tm1a/1c/1d       | FWD                            | TGCCCCTCTCACCTCTTAGC           |
|                        |                       | REV                            | ACCTGAGACCTTTGCCTTGG           |
|                        |                       | Cas1-R                         | TCGTGGTATCGTTATGCGCC           |
|                        | tm1b-generic          | FWD                            | CTCCCACACCTCCCCCTGAA           |
|                        |                       | REV                            | TGAACTGATGGCGAGCTCAGA          |
|                        | Flp                   | FWD                            | TCTTTAGCGCAAGGGGTAGGATCG       |
|                        |                       | REV                            | GTCCTGGCCACGGCAGAAGC           |
|                        | Cre                   | FWD                            | CAATTTACTGACCGTACACC           |
|                        |                       | REV                            | TCCCAGAAATGCCAGATTAC           |
|                        | Cts8-internal control | FWD                            | CAGTTTGGATTCTGAATGGC           |
|                        |                       | REV                            | ACAGCCTCTTTTTCTCCAGTC          |
|                        | Neomycin              | FWD                            | TGCTCCTGCCGAGAAAGTATCCATCATGGC |
| REV                    |                       | CGCCAAGCTCTTCAGCAATATCACGGGTAG |                                |
| Sry                    | FWD                   | TTGTCTAGAGAGCATGGAGGGCCATGTCAA |                                |
|                        | REV                   | CCACTCCTCTGTGACACTTTAGCCCTCCGA |                                |
| <b>RT-PCR</b>          | Essrb                 | FWD                            | AGTACAAGCGACGGCTGG             |
|                        |                       | REV                            | CCTAGTAGATTCGAGACGATCTTAGTCA   |
|                        | Eomes                 | FWD                            | TCGCTGTGACGGCCTACCAA           |
|                        |                       | REV                            | AGGGGAATCCGTGGGAGATGGA         |

|                                          |                       |                         |                             |
|------------------------------------------|-----------------------|-------------------------|-----------------------------|
| Cdx2                                     | FWD                   | AGTGAGCTGGCTGCCACACT    |                             |
|                                          | REV                   | GCTGCTGCTGCTTCTTCTTGA   |                             |
| Slc16a1<br>(Mct1)                        | FWD                   | CTCCAGTGCTGTGGGCTTGG    |                             |
|                                          | REV                   | GCGATGATGAGGATCACGCCA   |                             |
| Hbegf                                    | FWD                   | GTGCTCAGGGGGTCCAGGACTT  |                             |
|                                          | REV                   | TTCTTTGCTTGGGGTGGCCAGG  |                             |
| Atp11a                                   | FWD                   | ACTGGACGTTTCTCGGCCTT    |                             |
|                                          | REV                   | TGAACACCAGCGTCCCAGAA    |                             |
| Bmper                                    | FWD                   | CAGAGAGGCGCCTGCTGTGAAC  |                             |
|                                          | REV                   | AGCCGGGGTTTGCCACTTGAAG  |                             |
| Syna                                     | FWD                   | CCTCACCTCCCAGGCCCTC     |                             |
|                                          | REV                   | GGCAGGGAGTTTGCCACGA     |                             |
| Gcm1                                     | FWD                   | ACTTCTGGAGGCACGACGGA    |                             |
|                                          | REV                   | TCGGGATTTTCAGCAGGAAGCG  |                             |
| Synb                                     | FWD                   | GGCAACTCTCCGCAGCTGACAC  |                             |
|                                          | REV                   | ACGAACCAGCTGTGCTTGAGCC  |                             |
| Ctsq                                     | FWD                   | AATTGGCTATGGTTATGTGGGA  |                             |
|                                          | REV                   | TCACACAGTAGGGTATTGGG    |                             |
| Lepr                                     | FWD                   | GCTGGGATGTGCGTTGGAGGAC  |                             |
|                                          | REV                   | TGCTGGTCGCGTCGGAGTCATA  |                             |
| Tpbpa                                    | FWD                   | ACTGGAGTGCCCAGCACAGC    |                             |
|                                          | REV                   | GCAGTTCAGCATCCAAGTGGC   |                             |
| Plf/Prl2c2                               | FWD                   | AACGCAGTCCGGAACGGGG     |                             |
|                                          | REV                   | TGTCTAGGCAGCTGATCATGCCA |                             |
| Sdha                                     | FWD                   | TGGTGAGAACAAGAAGGCATCA  |                             |
|                                          | REV                   | CGCCTACAACCACAGCATCA    |                             |
| Atp11a ex5-7                             | FWD                   | GTCGGAAGCTGAGGGTTGGG    |                             |
|                                          | REV                   | GTGGCGTGCAAGCTGTCAAC    |                             |
| Smg9 ex5-7                               | FWD                   | AGAGCGCATGAAGCACAGCA    |                             |
|                                          | REV                   | GGTTGCCCCCTCGTTCCTTC    |                             |
| Ssr2 ex1-2                               | FWD                   | CATGCTTGGGTCGATTGCTCAC  |                             |
|                                          | REV                   | ATCTAATGCAGCGCTGGAGCC   |                             |
| <b>Genotyping<br/>CRISPR in<br/>TSCs</b> | Smg9-ex4-out          | FWD                     | GCTGCGTTCCTCTCCTCAGGA       |
|                                          |                       | REV                     | GTTCTGGAGGGGTGTGGACGGA      |
|                                          | Smg9-ex4-in<br>3' end | FWD                     | GCTGCGTTCCTCTCCTCAGGA       |
|                                          |                       | REV                     | GTGTGGGTCTCTGCCCTCCTT       |
|                                          | Smg9-WT               | FWD                     | TGCCCTCTCACCTCTTAGC         |
|                                          |                       | REV                     | ACCTGAGACCTTTGCCTTGG        |
|                                          | Pparg_out             | FWD                     | TGGGGTGTGTGACTTGCCTGA       |
|                                          |                       | REV                     | TGACCCCATGCCTTTGATGCACA     |
|                                          | Pparg_in<br>3' end    | FWD                     | GAAAGCAGCGGGAAGTTTGG        |
|                                          |                       | REV                     | GAGGCCTGTTGTAGAGCTGG        |
|                                          | Atp11a_out            | FWD                     | GGATGCACTTAGTTCAGAGTTGA     |
|                                          |                       | REV                     | CTGTGAGGGTGTGCTGCTCA        |
|                                          | Atp11a_in<br>3' end   | FWD                     | GGAAGAGCAGGATGGCTAAGTCACC   |
|                                          |                       | REV                     | GACTTCATAGCCTGTGAGGGTGTGCTG |

**Raw images – Genotyping gels of Suppl. Fig. 3e**

Lane loading as indicated in Suppl. Fig. 3e

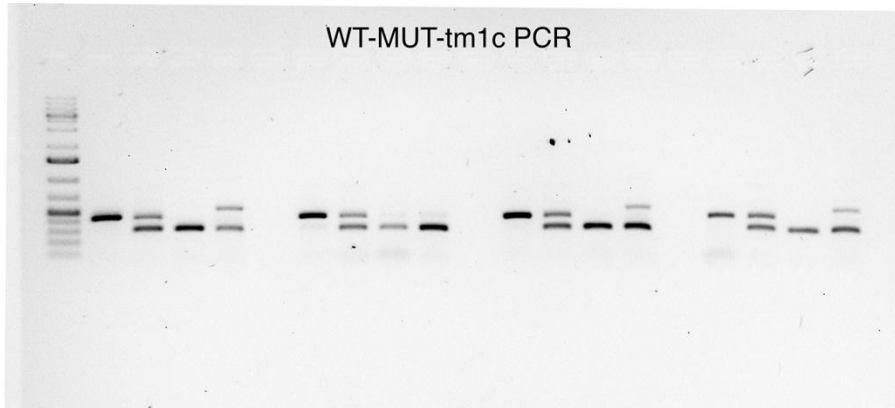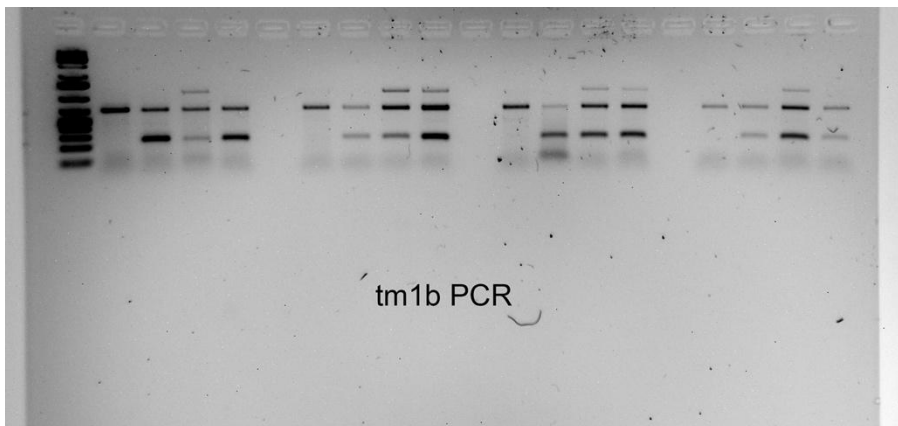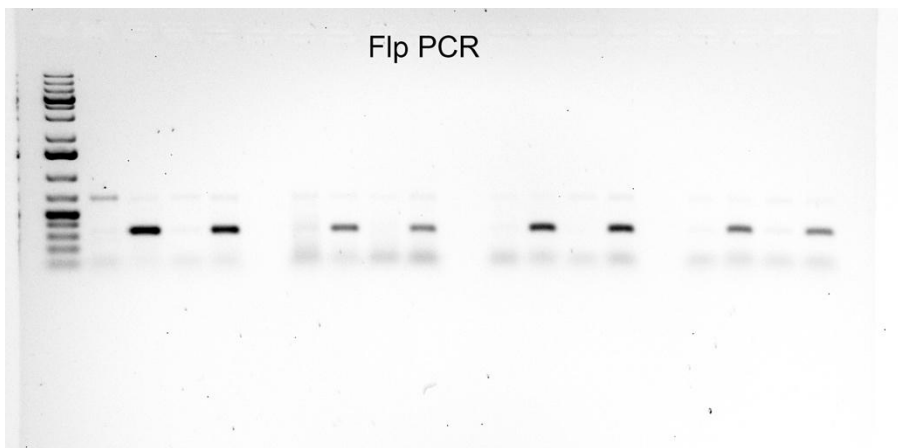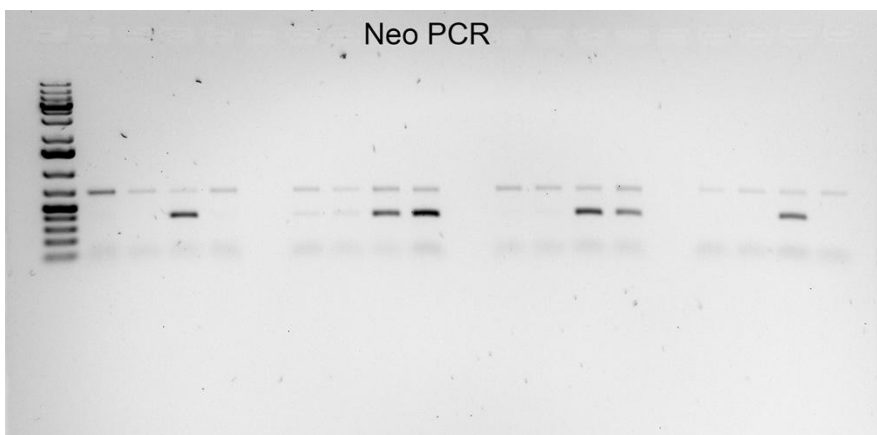



### Supplemental References

1. He, P., Williams, B. A., Trout, D., Marinov, G. K., Amrhein, H., Berghella, L. *et al.* The changing mouse embryo transcriptome at whole tissue and single-cell resolution. *Nature* **583**, 760-767 (2020).
2. Marsh, B. & Blelloch, R. Single nuclei RNA-seq of mouse placental labyrinth development. *Elife* **9** (2020).
3. Jew, B., Alvarez, M., Rahmani, E., Miao, Z., Ko, A., Garske, K. M. *et al.* Accurate estimation of cell composition in bulk expression through robust integration of single-cell information. *Nat. Commun.* **11**, 1971 (2020).

## Supplementary Note

### Detailed description of $\mu$ CT imaging and image analysis

Embryos were fixed overnight in 4% PFA and stored in PBS. Fixed embryos were then stained overnight in Lugol's iodine (2.5% w/v I<sub>2</sub>KI) dye and embed in 1% agarose immediately before scanning. Images were obtained on a ZEISS Xradia Versa 520 X-ray microscope 186 (Carl Zeiss AG, Oberkochen, Germany) with the following settings: 0.4X objective, 50kV, 4W, Binning 2, exposure: 2s. The resolution obtained was 10-12.89 $\mu$ m/pixel. Reconstruction was completed by the the ZEISS XMReconstructor software and converted to TIFF files with ZEISS XMcontroller software. Segmentation of images obtained were completed in Slicer (version 4.11.20210226) with the MarkupsTOModel and SegmentEditorExtraEffects plugins. The following volumes were collected:

#### *Volume of Ventricular Space:*

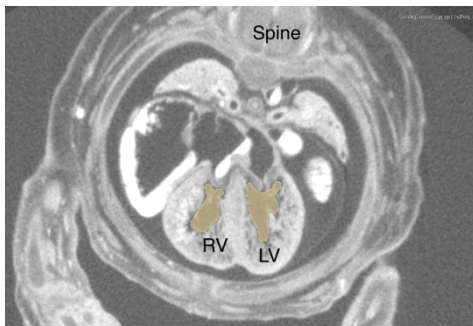

2D- No VSD

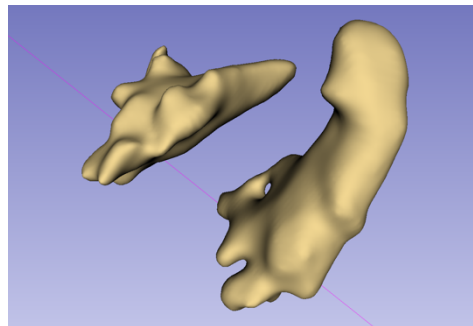

3D - No VSD

#### *Volume of Ventricular muscle:*

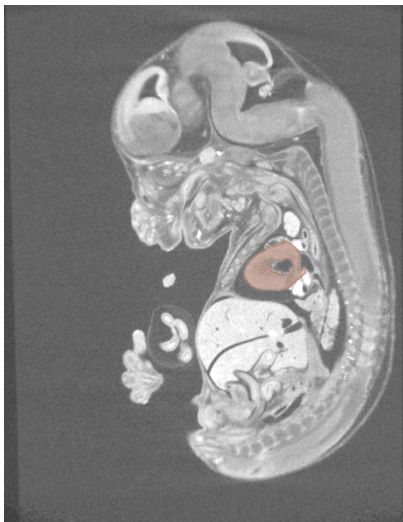

2D

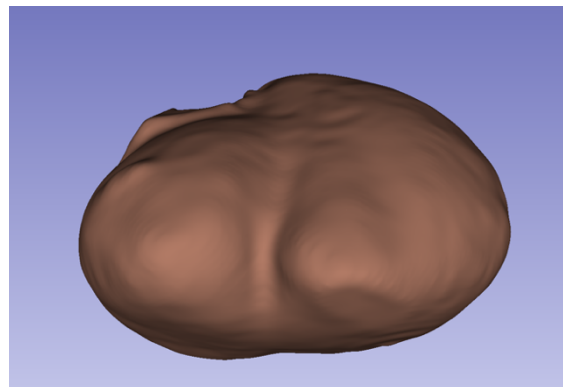

3D

*Volume of Liver:*

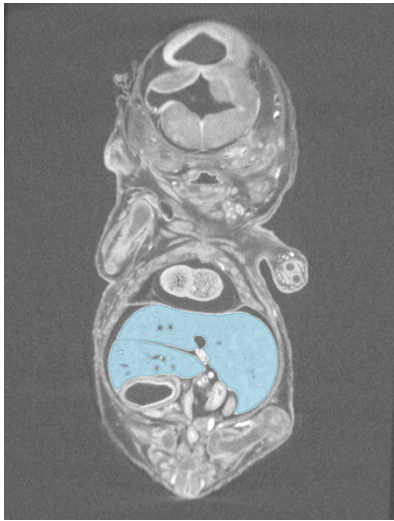

2D

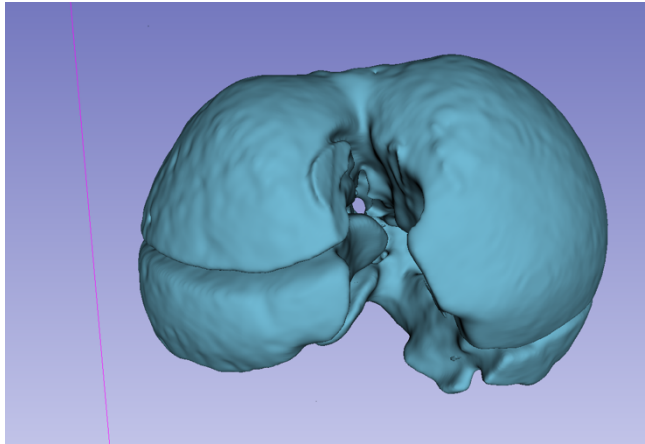

3D

*Septal Hole Size:*

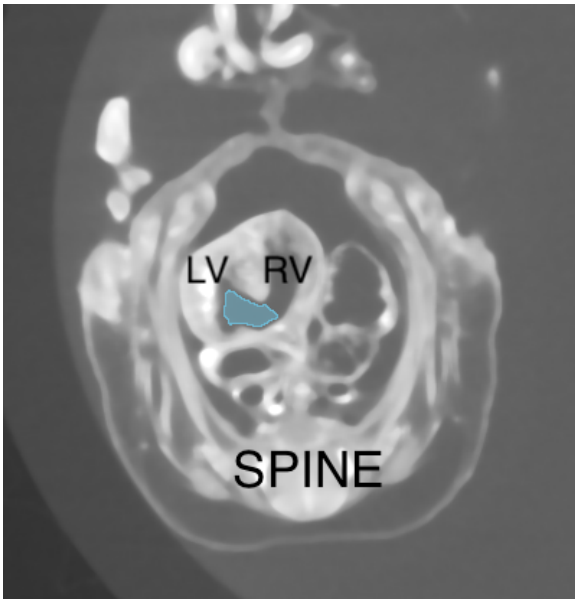

2D

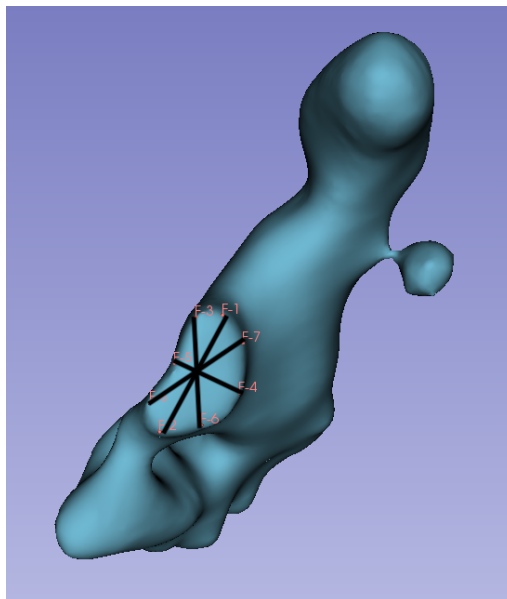

3D

Average of the 4 lengths from the cross-section of the septal hole.

*Ventricular Thickness (1), Compact Layer Thickness and Trabecular Layer Thickness:*

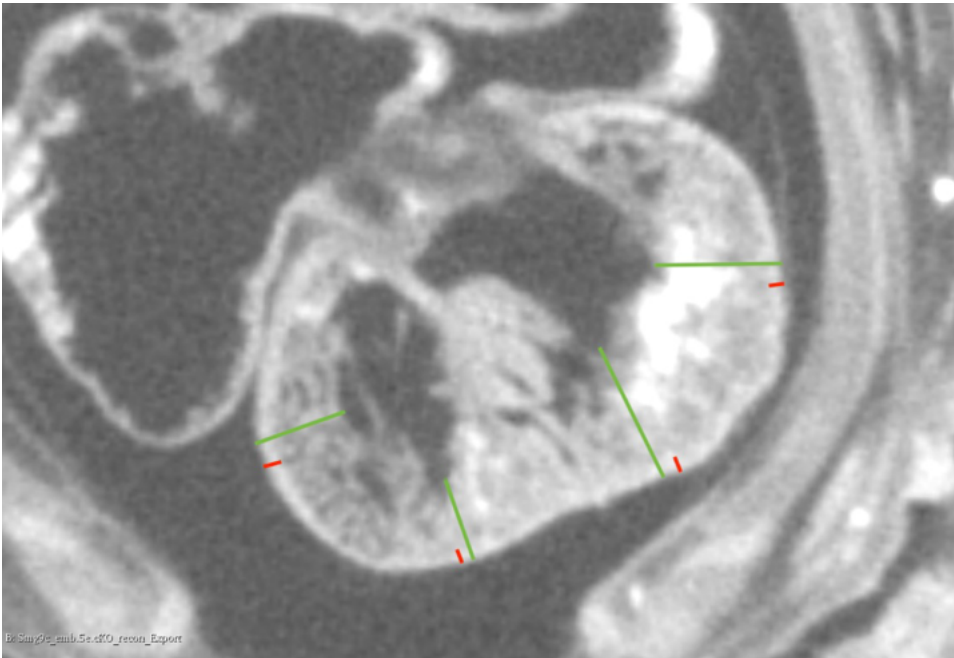

Ventricular Thickness = Average of lengths of green lines

Compact layer Thickness = Average of lengths of red lines

Trabecular Layer Thickness = Average of green line lengths - Average of red line lengths

*Examples of perimembranous and muscular VSDs (flood-filled ventricular spaces- see “Volume of Ventricular Space”):*

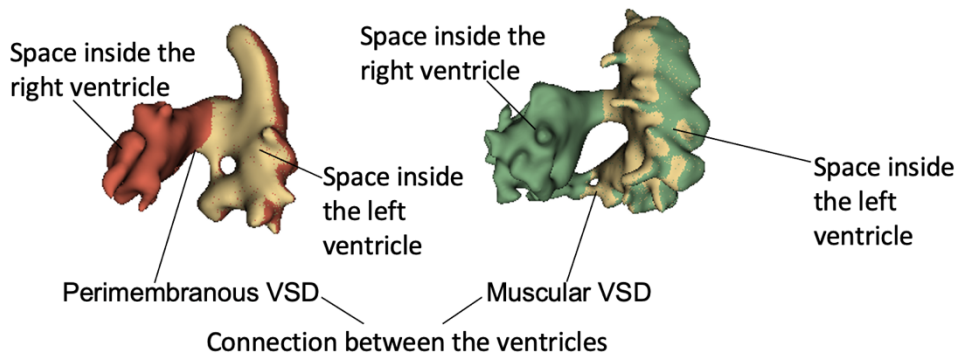

*Embryo Length:*

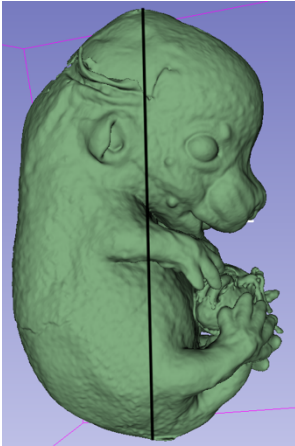

Measurements were then normalized to the embryo length to account for differences in embryo size. 2D and 3D measurements were normalized by embryo length and the means were compared in GraphPad (9.4) with a one-way ANOVA and Holm-Šídák's post-hoc test.
